# Supplementary material
Source: publisher site journal article supplement (https://www.dovepress.com/article/484146)
Supplement: Supplementary file 1 [file get_supplementary_file.php]

**SUPPLEMENT**

**Contents**

**Table S1**. Prednisolone equivalence factors (PEF) 1

**Table S2**. Criteria defining the risk cohorts for 18 OCS-related adverse outcomes 2

**Table S3**. Correlated, associated and excluded risk factors for 17 OCS-related adverse outcomes 3

**Table S4**. Selection of patient risk cohorts for modelling OCS-related adverse outcomes, with frequency 7

**Table S5**. Mean annual OCS prescription categories pre- and post-index date. 8

**Table S6**. Pre- to post-index change in mean annual OCS prescriptions category 9

**Table S7**. Univariable binary regression for variables in the type 2 diabetes risk cohort 10

**Table S8**. Univariable binary regression for variables in the non-menopausal osteoporosis risk cohort 11

**Table S9**. Univariable binary regression for variables in the post-menopausal osteoporosis risk cohort 12

**Table S10**. Univariable binary regression for variables in the hypertension risk cohort 13

**Table S11**. Univariable binary regression for variables in the pneumonia risk cohort 14

**Table S12**. Univariable binary regression for variables in the anxiety/depression risk cohort 15

**Table S13**. Univariable binary regression for variables in the BMI increase ≥1 mg/m2 risk cohort 16

**Table S14**. Univariable binary regression for variables in the BMI increase ≥5 mg/m2 risk cohort 17

**Table S15**. Univariable binary regression for variables in the cataracts risk cohort 18

**Table S16**. Univariable binary regression for variables in the cerebrovascular accident (stroke) risk cohort 19

**Table S17**. Univariable binary regression for variables in the cerebro-cardiovascular disease risk cohort 20

**Table S18**. Univariable binary regression for variables in the dyslipidaemia risk cohort 21

**Table S19**. Univariable binary regression for variables in the glaucoma risk cohort 22

**Table S20**. Univariable binary regression for variables in the heart failure risk cohort 23

**Table S21**. Univariable binary regression for variables in the myocardial infarction risk cohort 24

**Table S22**. Univariable binary regression for variables in the non-menopausal osteoporotic fractures risk cohort 25

**Table S23**. Univariable binary regression for variables in the post-menopausal osteoporotic fractures risk cohort 26

**Table S24**. Univariable binary regression for variables in the peptic ulcer model 27

**Table S25**. Univariable binary regression for variables in the renal impairment (CKD, stage ≥3a) model 28

**Table S26**. Univariable binary regression for variables in the sleep apnoea model 29

**Table S27**. Multivariable Cox proportional hazard model for anxiety/depression 30

**Table S28**. Multivariable Cox proportional hazard model for BMI increase ≥1 mg/m2 31

**Table S29**. Multivariable Cox proportional hazard model for BMI increase ≥5 mg/m2 32

**Table S30**. Multivariable Cox proportional hazard model for type cataracts 33

**Table S31**. Multivariable Cox proportional hazard model for cerebrovascular accident (stroke) 34

**Table S32**. Multivariable Cox proportional hazard model for cerebro-cardiovascular disease 35

**Table S33**. Multivariable Cox proportional hazard model for dyslipidaemia 36

**Table S34**. Multivariable Cox proportional hazard model for glaucoma 37

**Table S35**. Multivariable Cox proportional hazard model for heart failure 38

**Table S36**. Multivariable Cox proportional hazard model for myocardial infarction 39

**Table S37**. Multivariable Cox proportional hazard model for non-menopausal osteoporosis 40

**Table S38**. Multivariable Cox proportional hazard model for non-menopausal osteoporotic fractures 41

**Table S39**. Multivariable Cox proportional hazard model for post-menopausal osteoporotic fractures 42

**Table S40**. Multivariable Cox proportional hazard model for peptic ulcer 43

**Table S41**. Multivariable Cox proportional hazard model for renal impairment (CKD stage ≥3a) 44

**Table S42**. Multivariable Cox proportional hazard model for sleep apnoea 45

**Table S43**. Model validation tests for 15 OCS-related adverse outcomes 46

**Table S44**. Anxiety/depression: predicted risk by change in mean annual OCS prescription category
(with all other factors held constant) 47

**Table S45**. BMI increase ≥1 mg/m2: predicted risk by change in mean annual OCS prescription category
(with all other factors held constant) 47

**Table S46**. BMI increase ≥5 mg/m2: predicted risk by change in mean annual OCS prescription category
(with all other factors held constant) 47

**Table S47**. Cataracts: predicted risk by change in mean annual OCS prescription category
(with all other factors held constant) 47

**Table S48.** Cerebrovascular accident (stroke): predicted risk by change in mean annual OCS prescription category (with all other factors held constant) 48

**Table S49**. Cerebro-cardiovascular disease: predicted risk by change in mean annual OCS prescription category (with all other factors held constant) 48

**Table S50**. Dyslipidaemia: predicted risk by change in mean annual OCS prescription category
(with all other factors held constant) 48

**Table S51**. Glaucoma: predicted risk by change in mean annual OCS prescription category
(with all other factors held constant) 49

**Table S52**. Heart failure: predicted risk by change in mean annual OCS prescription category
(with all other factors held constant) 49

**Table S53**. Hypertension: example patient risk estimates by change in mean annual OCS prescription category (with all other factors held constant) 49

**Table S54**. Non-menopausal osteoporosis: predicted risk by change in mean annual OCS prescription category (with all other factors held constant) 49

**Table S55**. Non-menopausal osteoporotic fractures: predicted risk by change in mean annual OCS prescription category (with all other factors held constant) 50

**Table S56**. Post-menopausal osteoporotic fractures: predicted risk by change in mean annual OCS prescription category (with all other factors held constant) 50

**Table S57**. Peptic ulcer: predicted risk by change in mean annual OCS prescription category
(with all other factors held constant) 50

**Table S58**. Pneumonia: predicted risk by change in mean annual OCS prescription category
(with all other factors held constant) 50

**Table S59**. Renal impairment (CKD stage ≥3): predicted risk by change in mean annual OCS prescription category (with all other factors held constant) 51

**Table S60**. Sleep apnoea: predicted risk by change in mean annual OCS prescription category
(with all other factors held constant) 51

**Table S61**. Type 2 diabetes mellitus: predicted risk by change in mean annual OCS prescription category
(with all other factors held constant) 51

**Figure S1**. Kaplan Meier curves showing survival by risk group. A) Type 2 diabetes. B) Post-menopausal osteoporosis. C) Hypertension. D) Pneumonia. 52

| **Table S1. Prednisolone equivalence factors** (PEF) | | |
| --- | --- | --- |
| **Drug** | **Dose equivalent to 5 mg prednisolone**a | **PEF** |
| Betamethasone | 750 µg | 6.67 |
| Cortisone acetate | 25 mg | 0.20 |
| Deflazacort | 6 mg | 0.83 |
| Dexamethasone | 750 µg | 6.67 |
| Hydrocortisone | 20 mg | 0.25 |
| Methylprednisolone | 4 mg | 1.25 |
| Prednisolone | 5 mg | 1.00 |
| Prednisone | 5 mg | 1.00 |
| Triamcinolone | 4 mg | 1.25 |
| aUnited Kingdom National Institute for Health and Care Excellence (NICE). Clinical Knowledge Summaries: Equivalent anti-inflammatory doses of oral corticosteroids. Revised January 2024. Accessed on 12 February 2024 at: <https://cks.nice.org.uk/topics/corticosteroids-oral/background-information/equivalent-anti-inflammatory-doses/> | | |

| **Table S2. Criteria defining the risk cohorts for 18 OCS-related adverse outcomes** | | |
| --- | --- | --- |
| **Outcome** | **Risk cohort exclusion criteria** | **Definition of post-index onset** |
| **Anxiety/Depression** | Anxiety depression code(s) ever before index date | Anxiety/depression diagnostic code(s) in outcome period |
| **BMI increase** (≥1 kg/m2) | No BMI value available within 5 years before index date | BMI increaseby ≥1 kg/m2 compared to the last BMI within 5 years before index date |
| **BMI increase** (≥5 kg/m2) | No BMI value available within 5 years before index date | BMI increaseby ≥5 kg/m2 compared to the last BMI within 5 years before index date |
| **Cataracts** | Code for cataract or cataract surgery ever before index date | Cataract diagnostic code or surgery for cataract in outcome period |
| **Cerebrovascular accident** | Cerebrovascular accident code ever before index date | Cerebrovascular accident diagnostic code in outcome period |
| **Cerebro-cardiovascular disease** | Cardiovascular disease (myocardial infarction, heart failure, or stroke) code ever before index date | Cardiovascular disease (myocardial infarction, heart failure, or stroke) diagnostic code in outcome period |
| **Diabetes mellitus** (type 2) | Codes for diabetes mellitus type 1 **OR** type 2, **OR** for gestational diabetes, ever before index date | Type 2 diabetes mellitus diagnostic code in outcome period |
| **Dyslipidaemia** | Dyslipidaemia code, **OR** total cholesterol >6.5 mmol/L, **OR** low-density lipoprotein >4 mmol/L, **OR** triglycerides ≥2.3 mmol/L,  **OR** lipid-regulating medication, ever before index date | Diagnostic code for dyslipidaemia, **OR** total cholesterol >6.5 mmol/L, **OR** low-density lipoprotein cholesterol >4 mmol/L,  **OR** triglycerides ≥2.3 mmol/L, in outcome period |
| **Glaucoma** | Glaucoma code ever before index date | Glaucoma diagnostic code in outcome period |
| **Heart failure** | Heart failure code ever before index date | Heart failure diagnostic code in outcome period |
| **Hypertension** | Hypertension code **AND/OR** blood pressure ≥ 140/90 mm Hg,  ever before index date | Hypertension diagnostic code or blood pressure ≥140/90 mm Hg in outcome period |
| **Myocardial infarction** | Myocardial infarction ever before index date | Myocardial infarction diagnostic code in outcome period |
| **Osteoporosis** | Osteoporosis code ever before index date | Osteoporosis diagnostic code in outcome period |
| **Osteoporotic fracture** | Osteoporotic fracture code ever before index date | Osteoporotic fracture code in outcome period, **OR** [Osteoporosis diagnostic code ever **AND** code for osteoporotic fracture (hip, wrist, or spinal) likely in outcome period] |
| **Peptic ulcer** | Peptic ulcer code ever before index date | Peptic ulcer diagnostic code in outcome period |
| **Pneumonia** | Pneumonia diagnostic code within 4 weeks before index date | Diagnostic code for pneumonia in outcome period |
| **Renal impairment** | Code for chronic kidney disease stage ≥3a, **OR** dialysis, **OR** renal transplant, ever before index date | Chronic kidney disease stage ≥3a diagnostic code, **OR** dialysis code, **OR** renal transplant code, in outcome period |
| **Sleep apnoea** | Sleep apnoea code ever before index date | Sleep apnoea diagnostic code in outcome period |
| OCS, oral corticosteroids; BMI, body mass index. | | |

| **Table S3.** **Correlated, associated, and excluded risk factors for 17 OCS-related adverse outcomes** | | | | |
| --- | --- | --- | --- | --- |
|  | **Risk factors identified from published literature** | | | |
| **Correlated**source(s) | **Associated**source(s) | **Excluded**a | |
| **Anxiety/depression** | Age, asthma duration, gender, number of chronic conditions1-3,b | BMI, diabetes (any), dementia, smoking, race/ethnicity4,5 | Family history, alcohol use, marital status, education, socioeconomic status | |
| **BMI increase**  (≥1 kg/m2 or ≥5 kg/m2) | Pre-index BMI, gender, anxiety/depression6,7 | Race/ethnicity8, smoking (inverse relationship)9 | Family history, diet, alcohol use, physical activity, socioeconomic status | |
| **Cataracts** | Age, diabetes (any), hypertension, smoking10-12 | BMI, gender, glaucoma10-12 | Alcohol use, socioeconomic status | |
| **Cerebrovascular accident** (stroke) | Age, atrial fibrillation, BMI, T2DM, gender, race/ ethnicity, heart failure, hypertension, smoking13 | Anxiety/depression13, dyslipidaemia14 | Family history, diet, alcohol use, physical inactivity | |
| **Cerebro-cardiovascular disease**c | Age, atrial fibrillation, BMI, gender, race/ethnicity, T2DM, dyslipidaemia, hypertension, smoking13-18 | Anxiety/depression13, CKD (any)19, COPD17, RA17, sleep apnoea19 | Family history, alcohol use, diet, education, physical inactivity, socioeconomic status | |
| **Diabetes mellitus** (type 2) | Age, BMI, gender, smoking, hypertension20,21 | Cerebro-cardiovascular disease, race/ethnicity, anxiety/depression5,22 | Family history, education, physical activity, socioeconomic status | |
| **Dyslipidaemia** | Age, BMI, T2DM, gender, hypertension, smoking23 | Race/ethnicity24 | Data sources identified none unavailable in EMR | |
| **Glaucoma** | Age, BMI, gender, race/ethnicity25-27 | T2DM27, hypertension27, sleep apnoea26, smoking25 | Family history, intraocular pressure | |
| **Heart failure** | Age, BMI, T2DM, gender, hypertension, myocardial infarction18,19 | Anxiety/depression, CKD (any), dyslipidaemia, smoking, sleep apnoea19 | Alcohol use, dietary sodium intake, physical activity, socioeconomic status | |
| **Hypertension** | Age, BMI, T2DM, race/ethnicity28,29 | Anxiety/depression30, smoking29 | Family history, alcohol use, education, occupation | |
| **Myocardial infarction** | Age, atrial fibrillation, BMI, T2DM dyslipidaemia, gender, hypertension, smoking15-17 | COPD, RA, stroke17 | Family history, alcohol use, education, socioeconomic status | |
| **Osteoporosis** (non- or post-menopausal) | Aged, BMI, Crohn’s disease, genderd, epilepsy, race/ ethnicity, smoking, RA31, 32, time since menopause33 | Cerebro-cardiovascular disease, CKD (any), T2DM, liver disease | Family history, alcohol use, physical activity |
| **Osteoporotic fractures** (non- or post-menopausal) | Age, BMI, race/ethnicity, epilepsy, HRT, menopause, osteoporosis, RA, smoking34-37 | Stroke38, COPD37, CKD (any)37, Crohn’s disease36, dementia37,39, diabetes (any)36,37, liver disease36 | Family history, bone mineral density, physical activity | |
| **Peptic ulcer** | Age, gender, smoking40,41 | BMI42 | Family history, diet, *H. Pylori* infection, occupation | |
| **Pneumonia** | Age, COPD, gender, pneumococcus vaccine, pneumonia >4 weeks prior, smoking43-45 | BMI, dementia, diabetes (any), epilepsy, heart failure, hypertension, liver disease, CKD (any), stroke44,46 | Chronic alcohol use, dental hygiene, HIV | |
| **Renal impairment** (CKD, stage ≥3a) | Age, BMI, T2DM, race/ethnicity, gender, hypertension, smoking47-49 | Dyslipidaemia49, sleep apnoea50 | Family history, alcohol use, HIV, low birth weight, recreational drug use, socioeconomic status | |
| **Sleep apnoea** | Age, BMI, gender, smoking51 | Race/ethnicity52 | Craniofacial structure, fluid retention, lung volume | |
| OCS, oral corticosteroids; BMI, body mass index; T2DM, type 2 diabetes mellitus; CKD, chronic kidney disease; COPD, chronic obstructive pulmonary disease; RA, rheumatoid arthritis; EMR, electronic medical records; HRT, hormone replacement therapy; .HIV, human immunodeficiency virus.  aDocumented risk factors that might not be available from EMR or easily quantified for input into risk models were excluded intentionally.  bAmong: COPD, Crohn’s disease, CKD (stage ≥3a), connective tissue disorders, diabetes (any type), epilepsy, heart failure, liver disease, and RA; excluding asthma, as everyone in the target population has asthma.  cDiagnosis of any among: cerebrovascular accident, heart failure, myocardial infarction.  dThe post-menopause model excluded age, due high correlation with time since-menopause, and gender, as all patients were female by definition. | | | | |

**References**

1. Vink D, Aartsen MJ, Schoevers RA. Risk factors for anxiety and depression in the elderly: a review. J Affect Disord. 2008;106:29-44. doi: 10.1016/j.jad.2007.06.005
2. Choi GS, Shin YS, Kim JH, et al. Prevalence and risk factors for depression in Korean adult patients with asthma: is there a difference between elderly and non-elderly patients? J Korean Med Sci. 2014;29:1626-31. doi: 10.3346/jkms.2014.29.12.1626
3. Schoevers RA, Beekman AT, Deeg DJ, Jonker C, van Tilburg W. Comorbidity and risk-patterns of depression, generalised anxiety disorder and mixed anxiety-depression in later life: results from the AMSTEL study. Int J Geriatr Psychiatry. 2003;18:994-1001. doi: 10.1002/gps.1001
4. Cummings SM, Neff JA, Husaini BA. Functional impairment as a predictor of depressive symptomatology: the role of race, religiosity, and social support. Health Soc Work. 2003;28:23-32. doi: 10.1093/hsw/28.1.23
5. Rotella F, Mannucci E. Diabetes mellitus as a risk factor for depression. A meta-analysis of longitudinal studies. Diabetes Res Clin Pract. 2013;99:98-104. doi: 10.1016/j.diabres.2012.11.022
6. Stice E, Presnell K, Shaw H, Rohde P. Psychological and behavioral risk factors for obesity onset in adolescent girls: a prospective study. J Consult Clin Psychol. 2005;73:195-202. doi: 10.1037/0022-006X.73.2.195
7. Martin KS, Ferris AM. Food insecurity and gender are risk factors for obesity. J Nutr Educ Behav. 2007;39:31-6. doi: 10.1016/j.jneb.2006.08.021
8. Cossrow N, Falkner B. Race/ethnic issues in obesity and obesity-related comorbidities. J Clin Endocrinol Metab. 2004;89:2590-4. doi: 10.1210/jc.2004-0339
9. Dare S, Mackay DF, Pell JP. Correction: Relationship between Smoking and Obesity: A Cross-Sectional Study of 499,504 Middle-Aged Adults in the UK General Population. PLoS One. 2017;12:e0172076. doi: 10.1371/journal.pone.0172076. Erratum for: PLoS One. 2015;10:e0123579
10. Delcourt C, Cristol JP, Tessier F, Léger CL, Michel F, Papoz L. Risk factors for cortical, nuclear, and posterior subcapsular cataracts: the POLA study. Pathologies Oculaires Liées à l'Age. Am J Epidemiol. 2000;151:497-504. doi: 10.1093/oxfordjournals.aje.a010235
11. Ughade SN, Zodpey SP, Khanolkar VA. Risk factors for cataract: a case control study. Indian J Ophthalmol. 1998;46:221-7. <https://journals.lww.com/ijo/fulltext/1998/46040/risk_factors_for_cataract__a_case_control_study.7.aspx>
12. West SK, Valmadrid CT. Epidemiology of risk factors for age-related cataract. Surv Ophthalmol. 1995;39:323-34. doi: 10.1016/s0039-6257(05)80110-9
13. O'Donnell MJ, Xavier D, Liu L, et al. Risk factors for ischaemic and intracerebral haemorrhagic stroke in 22 countries (the INTERSTROKE study): a case-control study. Lancet. 2010;376:112-23. doi: 10.1016/S0140-6736(10)60834-3
14. Boehme AK, Esenwa C, Elkind MS. Stroke risk factors, genetics, and prevention. Circ Res. 2017;120:472-95. doi: 10.1161/CIRCRESAHA
15. Piegas LS, Avezum A, Pereira JC, et al. Risk factors for myocardial infarction in Brazil. Am Heart J. 2003;146:331-8. doi: 10.1016/S0002-8703(03)00181-9
16. Soliman EZ, Safford MM, Muntner P, et al. Atrial fibrillation and the risk of myocardial infarction. JAMA Intern Med. 2014;174:107-14. doi: 10.1001/jamainternmed.2013.11912. Erratum in: JAMA Intern Med. 2014;174:308.
17. Varas-Lorenzo C, Rodriguez LA, Maguire A, Castellsague J, Perez-Gutthann S. Use of oral corticosteroids and the risk of acute myocardial infarction. Atherosclerosis. 2007;192:376-83. doi: 10.1016/j.atherosclerosis.2006.05.019
18. Kannel WB, Belanger AJ. Epidemiology of heart failure. Am Heart J. 1991;121:951-7. doi: 10.1016/0002-8703(91)90225-7
19. Kenchaiah S, Narula J, Vasan RS. Risk factors for heart failure. Med Clin North Am. 2004;88:1145-72. doi: 10.1016/j.mcna.2004.04.016
20. Choi BC, Shi F. Risk factors for diabetes mellitus by age and sex: results of the National Population Health Survey. Diabetologia. 2001;44:1221-31. doi: 10.1007/s001250100648
21. Satman I, Omer B, Tutuncu Y, et al. Twelve-year trends in the prevalence and risk factors of diabetes and prediabetes in Turkish adults. Eur J Epidemiol. 2013;28:169-80. doi: 10.1007/s10654-013-9771-5
22. Bello O, Mohandas C, Shojee-Moradie F, et al. Black African men with early type 2 diabetes have similar muscle, liver and adipose tissue insulin sensitivity to white European men despite lower visceral fat. Diabetologia. 2019;62:835-44. doi: 10.1007/s00125-019-4820-6
23. Xi Y, Niu L, Cao N, et al. Prevalence of dyslipidemia and associated risk factors among adults aged ≥35 years in northern China: a cross-sectional study. BMC Public Health. 2020;20:1068. doi: 10.1186/s12889-020-09172-9
24. Frank AT, Zhao B, Jose PO, Azar KM, Fortmann SP, Palaniappan LP. Racial/ethnic differences in dyslipidemia patterns. Circulation. 2014;129:570-9. doi: 10.1161/CIRCULATIONAHA.113.005757
25. McMonnies CW. Glaucoma history and risk factors. J Optom. 2017;10:71-8. doi: 10.1016/j.optom.2016.02.003
26. Coleman AL, Kodjebacheva G. Risk factors for glaucoma needing more attention. Open Ophthalmol J. 2009;3:38-42. doi: 10.2174/1874364100903020038
27. Worley A, Grimmer-Somers K. Risk factors for glaucoma: what do they really mean? Aust J Prim Health. 2011;17:233-9. doi: 10.1071/PY10042
28. Kornitzer M, Dramaix M, De Backer G. Epidemiology of risk factors for hypertension: implications for prevention and therapy. Drugs. 1999;57:695-712. doi: 10.2165/00003495-199957050-00003
29. Shen Y, Chang C, Zhang J, Jiang Y, Ni B, Wang Y. Prevalence and risk factors associated with hypertension and prehypertension in a working population at high altitude in China: a cross-sectional study. Environ Health Prev Med. 2017;22:19. doi: 10.1186/s12199-017-0634-7
30. Jonas BS, Franks P, Ingram DD. Are symptoms of anxiety and depression risk factors for hypertension? Longitudinal evidence from the National Health and Nutrition Examination Survey I Epidemiologic Follow-up Study. Arch Fam Med. 1997;6:43-9. doi: 10.1001/archfami.6.1.43
31. Pouresmaeili F, Kamalidehghan B, Kamarehei M, Goh YM. A comprehensive overview on osteoporosis and its risk factors. Ther Clin Risk Manag. 2018;14:2029-49. doi: 10.2147/TCRM.S138000
32. Lambrinoudaki I, Kaparos G, Armeni E, et al. BsmI vitamin D receptor's polymorphism and bone mineral density in men and premenopausal women on long-term antiepileptic therapy. Eur J Neurol. 2011;18:93-8. doi: 10.1111/j.1468-1331.2010.03103.x
33. Fistarol M, Rezende CR, Figueiredo Campos AL, Kakehasi AM, Geber S. Time since menopause, but not age, is associated with increased risk of osteoporosis. Climacteric. 2019;22:523-6. doi: 10.1080/13697137.2019.1634046
34. Pinheiro MM, Reis Neto ET, Machado FS, et al. Risk factors for osteoporotic fractures and low bone density in pre and postmenopausal women. Rev Saude Publica. 2010;44:479-85. doi: 10.1590/s0034-89102010000300011
35. Rubin KH, Friis-Holmberg T, Hermann AP, Abrahamsen B, Brixen K. Risk assessment tools to identify women with increased risk of osteoporotic fracture: complexity or simplicity? A systematic review. J Bone Miner Res. 2013;28:1701-17. doi: 10.1002/jbmr.1956
36. Hippisley-Cox J, Coupland C. Predicting risk of osteoporotic fracture in men and women in England and Wales: prospective derivation and validation of QFractureScores. BMJ. 2009;339:b4229. doi: 10.1136/bmj.b4229
37. Hippisley-Cox J, Coupland C. Derivation and validation of updated QFracture algorithm to predict risk of osteoporotic fracture in primary care in the United Kingdom: prospective open cohort study. BMJ. 2012;344:e3427. doi: 10.1136/bmj.e3427
38. Colón-Emeric CS, Pieper CF, Artz MB. Can historical and functional risk factors be used to predict fractures in community-dwelling older adults? development and validation of a clinical tool. Osteoporos Int. 2002;13:955-61. doi: 10.1007/s001980200133
39. Tanaka S, Yoshimura N, Kuroda T, Hosoi T, Saito M, Shiraki M. The Fracture and Immobilization Score (FRISC) for risk assessment of osteoporotic fracture and immobilization in postmenopausal women--A joint analysis of the Nagano, Miyama, and Taiji Cohorts. Bone. 2010;47:1064-70. doi: 10.1016/j.bone.2010.08.019
40. Wang JY, Liu SB, Chen SY, Dobson A. Risk factors for peptic ulcer in Shanghai. Int J Epidemiol. 1996;25:638-43. doi: 10.1093/ije/25.3.638
41. Cai S, García Rodríguez LA, Massó-González EL, Hernández-Díaz S. Uncomplicated peptic ulcer in the UK: trends from 1997 to 2005. Aliment Pharmacol Ther. 2009;30:1039-48. doi: 10.1111/j.1365-2036.2009.04131.x
42. Wang FW, Tu MS, Mar GY, et al. Prevalence and risk factors of asymptomatic peptic ulcer disease in Taiwan. World J Gastroenterol. 2011;17:1199-203. doi: 10.3748/wjg.v17.i9.1199
43. Almirall J, Bolíbar I, Balanzó X, González CA. Risk factors for community-acquired pneumonia in adults: a population-based case-control study. Eur Respir J. 1999;13:349-55. doi: 10.1183/09031936.99
44. Sanz Herrero F, Blanquer Olivas J. Microbiology and risk factors for community-acquired pneumonia. Semin Respir Crit Care Med. 2012;33:220-31. doi: 10.1055/s-0032-1315634
45. Farr BM, Woodhead MA, Macfarlane JT, et al. Risk factors for community-acquired pneumonia diagnosed by general practitioners in the community. Respir Med. 2000;94:422-7. doi: 10.1053/rmed.1999.0743
46. Torres A, Peetermans WE, Viegi G, Blasi F. Risk factors for community-acquired pneumonia in adults in Europe: a literature review. Thorax. 2013;68:1057-65. doi: 10.1136/thoraxjnl-2013-204282
47. Kazancioğlu R. Risk factors for chronic kidney disease: an update. Kidney Int Suppl (2011). 2013;3:368-71. doi: 10.1038/kisup.2013.79
48. Luyckx VA, Tuttle KR, Garcia-Garcia G, et al. Reducing major risk factors for chronic kidney disease. Kidney Int Suppl (2011). 2017;7:71-87. doi: 10.1016/j.kisu.2017.07.003
49. McClellan WM, Flanders WD. Risk factors for progressive chronic kidney disease. J Am Soc Nephrol. 2003;14(7 Suppl 2):S65-70. doi: 10.1097/01.asn.0000070147.10399.9e
50. Mirrakhimov AE. Obstructive sleep apnea and kidney disease: is there any direct link? Sleep Breath. 2012;16:1009-16. doi: 10.1007/s11325-011-0624-8
51. Jordan AS, McSharry DG, Malhotra A. Adult obstructive sleep apnoea. Lancet. 2014;383:736-47. doi: 10.1016/S0140-6736(13)60734-5
52. Sutherland K, Lee RW, Cistulli PA. Obesity and craniofacial structure as risk factors for obstructive sleep apnoea: impact of ethnicity. Respirology. 2012;17:213-22. doi: 10.1111/j.1440-1843.2011.02082.x

| **Table S4. Selection of patient risk cohorts for modelling OCS-related adverse outcomes, with frequency** | | | | | | |
| --- | --- | --- | --- | --- | --- | --- |
| **Patients meeting eligibility criteria**a  (N = 249,226) | | **Diagnosed pre-index** | **Candidate patients** | **Missing  data** | **Selected for modelling** | **Developed outcome** (%) |
| **Anxiety/depression** | Included |  | 199,721 |  | 73,327 | 14,040 (19.1) |
| Excluded | −49,505 |  | −126,394 |  |  |
| **BMI increase**  (≥1 kg/m2) | Included |  | 249,226 |  | 114,263 | 15,695 (13.7) |
| Excluded | −0 |  | −134,963 |  |  |
| **BMI increase**  (≥5 kg/m2) | Included |  | 249,226 |  | 114,263 | 15,632 (13.7) |
| Excluded | −0 |  | −134,963 |  |  |
| **Cataracts** | Included |  | 243,594 |  | 109,409 | 7469 (6.8) |
| Excluded | −5632 |  | −134,185 |  |  |
| **Cerebrovascular accident** (stroke) | Included |  | 245,500 |  | 111,066 | 3616 (3.3) |
| Excluded | −3726 |  | −134,434 |  |  |
| **Cerebro-cardiovascular disease**b | Included |  | 240,711 |  | 106,913 | 7936 (7.4) |
| Excluded | −8515 |  | −133,798 |  |  |
| **Diabetes mellitus** (type 2) | Included |  | 239,073 |  | 104,461 | 7452 (7.1) |
| Excluded | −10,153 |  | −134,612 |  |  |
| **Dyslipidaemia** | Included |  | 211,245 |  | 80,383 | 17,777 (22.1) |
| Excluded | −37,981 |  | −130,862 |  |  |
| **Glaucoma** | Included |  | 246,767 |  | 112,210 | 1609 (1.4) |
| Excluded | −2459 |  | −134,557 |  |  |
| **Heart failure** | Included |  | 246,728 |  | 112,193 | 4110 (3.7) |
| Excluded | −2498 |  | −134,535 |  |  |
| **Hypertension** | Included |  | 217,314 |  | 86,305 | 12,055 (14.0) |
| Excluded | −31,912 |  | −131,009 |  |  |
| **Myocardial  infarction** | Included |  | 245,821 |  | 111,213 | 2565 (2.3) |
| Excluded | −3405 |  | −134,608 |  |  |
| **Osteoporosis** | Included |  | 245,230 |  | 110,893 | 4088 (3.7) |
| Excluded | −3996 |  | −134,337 |  |  |
| Non-menopausal |  |  |  |  | 76,285 | 1274 (1.7) |
| Post-menopausal |  |  |  |  | 34,608c | 2814 (8.1) |
| **Osteoporotic  fractures** | Included |  | 248,156 |  | 113,349 | 1523 (1.3) |
| Excluded | −1070 |  | −134,807 |  |  |
| Non-menopausal |  |  |  |  | 76,796 | 415 (0.5) |
| Post-menopausal |  |  |  |  | 36,553d | 1108 (3.0) |
| **Peptic ulcer** | Included |  | 245,392 |  | 111,131 | 1301 (1.2) |
| Excluded | −3834 |  | −134,261 |  |  |
| **Pneumonia** | Included |  | 249,138 |  | 114,197 | 6193 (5.2) |
| Excluded | −88 |  | −134,941 |  |  |
| **Renal impairment** (CKD, stage ≥3a) | Included |  | 244,116 |  | 109,571 | 7029 (6.4) |
| Excluded | −5110 |  | −134,545 |  |  |
| **Sleep apnoea** | Included |  | 247,633 |  | 112,783 | 1875 (1.7) |
| Excluded | −1593 |  | −134,850 |  |  |
| OCS, oral corticosteroids; BMI, Body Mass Index; CKD, chronic kidney disease; EMR, electronic medical records.  aAdults age ~18–90 with a visit during active asthma and ≥5 years of follow-up data (≥2 years pre-index and ≥3 years post-index).  bDiagnosis of any among: cerebrovascular accident, heart failure, myocardial infarction.  cMenopause status imputed in 15,918 women age ≥51 years without EMR documented menopause start date.  dMenopause status imputed in 16,861 women age ≥51 years without EMR documented menopause start date. | | | | | | |

| **Table S5. Mean annual OCS prescriptions categories pre- and post-index date** (N = 249,226) | | | | |
| --- | --- | --- | --- | --- |
| **OCS prescriptions category** (mean/year) | **Pre-index** | | **Post-index** | |
| **Number** (%) | **Yearly mean** (mg) | **Number** (%) | **Yearly mean** (mg) |
| **No OCS** (none) | 103,325 (41.5) | 0 | 67,250 (27.0) | 0 |
| **Low OCS** (<2) | 133,890 (53.7) | 103 | 158,620 (63.6) | 114 |
| **High OCS** (≥2) | 12,011 (4.8) | 1222 | 23,356 (9.4) | 1253 |
| OCS, oral corticosteroids. | | | | |

| **Table S6. Pre- to post-index change in mean annual OCS prescriptions category** (N = 249,226) | | | | | |
| --- | --- | --- | --- | --- | --- |
| **OCS prescriptions categories** | | **Number** | **Mean change**  (mg) | **Total** n (%) |
| **Category transition** | **Change score**a |
| High to None | −2 | 790 | −825 | 790 (0.3) |
| High to Low | −1 | 3659 | −569 | 54,448 (21.8) |
| Low to None | 50,789 | −68 |
| None to None | 0 | 15,671 | 0 | 96,096 (38.6) |
| Low to Low | 72,863 | 20 |
| High to High | 7562 | 270 |
| None to Low | +1 | 82,098 | 91 | 92,336 (37.0) |
| Low to High | 10,238 | 827 |
| None to High | +2 | 5556 | 1010 | 5556 (2.2) |
| OCS, oral corticosteroids.  aDifference between pre- and post-index OCS prescription categories, obtained by subtracting the pre-index category (0–2) from the post-index category (0–2) to give a 5-level variable (range −2 to +2, where 0 indicates unchanged OCS prescription). | | | | |

| **Table S7. Univariable binary regression for variables in the type 2 diabetes risk cohort** (N = 104,461) | | | | |
| --- | --- | --- | --- | --- |
|  | | **Post-index type 2 diabetes mellitus** | |  |
| **Variable** | | **Yes** | **No** (control) | **P-value** |
| **Number** (%) | | 7452 (7.1) | 97009 (92.9) | NA |
| **Post-index follow-up** (mean years ± SD) | | 5.6 ± 4.5 | 8 ± 4.6 | <0.001 |
| **Age** (mean years ± SD) | | 57.1 ± 13.6 | 50.1 ± 18.3 | <0.001 |
| **Gender**, n (%) | Male | 3006 (40) | 35,313 (36) | Ref |
| Female | 4446 (60) | 61,696 (64) | <0.001 |
| **Race/ethnicity**, n (%) | White | 4779 (64) | 64,483 (66) | Ref |
| Asian | 549 (7) | 3550 (4) | <0.001 |
| Black | 59 (1) | 476 (<1) | <0.001 |
| Middle Eastern | 10 (<1) | 64 (<1) | 0.028 |
| Other/Mixed | 147 (2) | 2093 (2) | 0.535 |
| Declined/Unknown | 1908 (26) | 26,343 (27) | 0.413 |
| **Pre-index BMI** (mean kg/m2 ± SD) | | 32.5 ± 6.9 | 27.8 ± 6.2 | <0.001 |
| **Smoking status**, n (%) | Non-smoker | 2,464 (33) | 38,610 (40) | Ref |
| Former smoker | 3,178 (43) | 36,815 (38) | <0.001 |
| Current smoker | 1,810 (24) | 21,584 (22) | <0.001 |
| **Asthma duration** (mean years ± SD) | | 12.3 ± 11.6 | 13.9 ± 11.7 | <0.001 |
| **Ever prescribed OCS**,  n (%) | No | 97 (1) | 2636 (3) | Ref |
| Yes | 7355 (99) | 94,373 (97) | <0.001 |
| **Pre-index OCS exposure, ever** (mean mg ± SD) | | 1083 ± 3646 | 752 ± 2521 | <0.001 |
| **Pre-index OCS prescriptions category** (mean/year), n (%) | No OCS (none) | 3146 (42) | 39,228 (40) | Ref |
| Low OCS (<2) | 3776 (51) | 53,142 (55) | <0.001 |
| High OCS (≥2) | 530 (7) | 4639 (5) | <0.001 |
| **Post-index OCS prescriptions category** (mean/year), n (%) | No OCS (none) | 1025 (14) | 29,342 (30) | Ref |
| Low OCS (<2) | 5049 (68) | 59,512 (61) | <0.001 |
| High OCS (≥2) | 1378 (18) | 8155 (8) | <0.001 |
| **Change in OCS prescriptions category** (score), n (%) | No change (0) | 3047 (41) | 38,933 (40) | Ref |
| 2 category decrease (−2) | 14 (<1) | 332 (<1) | 0.024 |
| 1 category decrease (−1) | 857 (12) | 22,748 (23) | <0.001 |
| 1 category increase (+1) | 3214 (43) | 33,178 (34) | <0.001 |
| 2 category increase (−2) | 320 (4) | 1818 (2) | <0.001 |
| **Anxiety/Depression**,  n (%) | No | 4650 (62) | 62,834 (65) | Ref |
| Yes | 2802 (38) | 34,175 (35) | <0.001 |
| **Cerebro-cardiovascular disease**, n (%) | No | 6750 (91) | 92,014 (95) | Ref |
| Yes | 702 (9) | 4995 (5) | <0.001 |
| **Hypertension**, n (%) | No | 4643 (62) | 77,512 (80) | Ref |
| Yes | 2809 (38) | 19,497 (20) | <0.001 |
| BMI, body mass index; OCS, oral corticosteroids; NA, not applicable; SD, standard deviation. | | | | |

| **Table S8. Univariable binary regression for variables in the non-menopausal osteoporosis risk cohort**  (N = 76,285) | | | | |
| --- | --- | --- | --- | --- |
|  | | **Post-index osteoporosis** | |  |
| **Variable** | | **Yes** | **No** (control) | **P-value** |
| **Number** (%) | | 1274 | 75,011 | NA |
| **Post-index follow-up** (mean years ± SD) | | 7.4 ± 5.4 | 8.1 ± 4.7 | <0.001 |
| **Age** (mean years ± SD) | | 59.8 ± 14.7 | 44.9 ± 17.4 | <0.001 |
| **Gender**, n (%) | Male | 706 (55) | 41,234 (55) | Ref |
| Female | 568 (45) | 33,777 (45) | 0.751 |
| **Race/ethnicity**, n (%) | White | 834 (65) | 48,518 (65) | Ref |
| Asian | 51 (4) | 3717 (5) | 0.121 |
| Black | 0 (0) | 465 (1%) | 0.911 |
| Middle Eastern | 1 (<1) | 70 (<1) | 0.854 |
| Other/Mixed | 20 (2) | 1758 (2) | 0.070 |
| Declined/Unknown | 368 (29) | 20,483 (27) | 0.484 |
| **Pre-index BMI** (mean kg/m2 ± SD) | | 25.9 ± 5.5 | 28.2 ± 6.4 | <0.001 |
| **Smoking status**, n (%) | Non-smoker | 406 (3) | 29,510 (39) | Ref |
| Former smoker | 561 (44) | 27,667 (37) | <0.001 |
| Current smoker | 307 (24) | 17,834 (24) | 0.003 |
| **Ever prescribed OCS**,  n (%) | No | 9 (1) | 2340 (3) | Ref |
| Yes | 1265 (99) | 72,671 (97) | <0.001 |
| **Pre-index OCS exposure, ever** (mean mg ± SD) | | 1368 ± 4247 | 632 ± 2282 | <0.001 |
| **Pre-index OCS prescriptions category** (mean/year), n (%) | No OCS (none) | 543 (43) | 32,603 (43) | Ref |
| Low OCS (<2) | 604 (47) | 39,571 (53) | 0.143 |
| High OCS (≥2) | 127 (10) | 2837 (4) | <0.001 |
| **Post-index OCS prescriptions category** (mean/year), n (%) | No OCS (none) | 108 (8) | 23,204 (31) | Ref |
| Low OCS (<2) | 801 (63) | 46,614 (62) | <0.001 |
| High OCS (≥2) | 365 (29) | 5193 (7) | <0.001 |
| **Change in OCS prescriptions category** (score), n (%) | No change (0) | 489 (38%) | 29,400 (39) | Ref |
| 2 category decrease (−2) | 1 (<1) | 206 (<1) | 0.219 |
| 1 category decrease (−1) | 100 (8) | 17,232 (23) | <0.001 |
| 1 category increase (+1) | 593 (47) | 26,947 (36) | <0.001 |
| 2 category increase (−2) | 91 (7) | 1226 (2) | <0.001 |
| **Cerebro-cardiovascular disease**, n (%) | No | 1129 (89) | 71,252 (95) | Ref |
| Yes | 145 (11) | 3759 (5) | <0.001 |
| **Chronic kidney disease (stage ≥3a**), n (%) | No | 1222 (96) | 73,348 (98) | Ref |
| Yes | 52 (4) | 1663 (2) | <0.001 |
| **Crohn’s disease**, n (%) | No | 1259 (99) | 74,575 (99) | Ref |
| Yes | 15 (1) | 436 (1) | 0.007 |
| **Dementia**, n (%) | No | 1272 (>99) | 74,873 (>99) | Ref |
| Yes | 2 (<1) | 138 (<1) | 0.824 |
| **Epilepsy**, n (%) | No | 1024 (80) | 59,671 (80) | Ref |
| Yes | 250 (20) | 15,340 (20) | 0.468 |
| **Liver disease** | No | 1229 (96) | 73,333 (98) | Ref |
| Yes | 45 (4) | 1678 (2) | 0.002 |
| **Rheumatoid arthritis** | No | 1233 (97) | 74,402 (99) | Ref |
| Yes | 41 (3) | 609 (1) | <0.001 |
| **Type 2 diabetes  mellitus**,n (%) | No | 1182 (93) | 70,276 (94) | Ref |
| Yes | 92 (7) | 4735 (6) | 0.187 |
| BMI, body mass index; OCS, oral corticosteroids; NA, not applicable; SD, standard deviation. | | | | |

| **Table S9. Univariable binary regression for variables in the post-menopausal osteoporosis risk cohort**  (N = 34,608) | | | | |
| --- | --- | --- | --- | --- |
|  | | **Post-index osteoporosis** | |  |
| **Variable** | | **Yes** | **No** (control) | **P-value** |
| **Number** (%) | | 2814 | 31,794 | NA |
| **Years since menopause** (mean ± SD) | | 14.5 ± 9.3 | 12.9 ± 9.3 | <0.001 |
| **Post-index follow-up** (mean years ± SD) | | 5.7 ± 4.4 | 7.7 ± 4.4 | <0.001 |
| **Age** (mean years ± SD) | | 67.1 ± 9.8 | 64.0 ± 10.7 | <0.001 |
| **Race/ethnicity**, n (%) | White | 1917 (68) | 21,701 (68) | Ref |
| Asian | 93 (3) | 1145 (4) | 0.447 |
| Black | 6 (<1) | 131 (<1) | 0.116 |
| Middle Eastern | 0 (0) | 12 (<1) | 0.914 |
| Other/Mixed | 47 (2) | 558 (2) | 0.757 |
| Declined/Unknown | 751 (27) | 8247 (26) | 0.499 |
| **Pre-index BMI** (mean kg/m2 ± SD) | | 26.9 ± 5.8 | 29.7 ± 6.8 | <0.001 |
| **Smoking status**, n (%) | Non-smoker | 1105 (39) | 11,996 (38) | Ref |
| Former smoker | 1167 (41) | 13,843 (44) | 0.043 |
| Current smoker | 542 (19) | 5955 (19) | 0.827 |
| **Ever prescribed OCS**,  n (%) | No | 29 (1) | 477 (2) | Ref |
| Yes | 2785 (99) | 31,317 (98) | 0.048 |
| **Pre-index OCS exposure, ever** (mean mg ± SD) | | 1274 ± 3530 | 971 ± 2664 | <0.001 |
| **Pre-index OCS prescriptions category** (mean/year), n (%) | No OCS (none) | 1071 (38) | 10,296 (32) | Ref |
| Low OCS (<2) | 1484 (53) | 19,356 (61) | <0.001 |
| High OCS (≥2) | 259 (9) | 2142 (7) | 0.040 |
| **Post-index OCS prescriptions category** (mean/year), n (%) | No OCS (none) | 341 (12) | 8938 (28) | Ref |
| Low OCS (<2) | 1801 (64) | 19,185 (60) | <0.001 |
| High OCS (≥2) | 672 (24) | 3671 (12) | <0.001 |
| **Change in OCS prescriptions category** (score), n (%) | No change (0) | 1215 (43) | 13,447 (42) | Ref |
| 2 category decrease (−2) | 8 (<1) | 151 (<1) | 0.143 |
| 1 category decrease (−1) | 297 (11) | 7893 (25) | <0.001 |
| 1 category increase (+1) | 1132 (40) | 9524 (30) | <0.001 |
| 2 category increase (−2) | 162 (6) | 779 (2) | <0.001 |
| **Cerebro-cardiovascular disease**, n (%) | No | 2553 (91) | 29,123 (92) | Ref |
| Yes | 261 (9) | 2671 (8) | 0.111 |
| **Chronic kidney disease (stage ≥3a**), n (%) | No | 2605 (93) | 29,459 (93) | Ref |
| Yes | 209 (7) | 2335 (7) | 0.872 |
| **Crohn’s disease**, n (%) | No | 2789 (99) | 31,604 (99) | Ref |
| Yes | 25 (1) | 190 (1) | 0.062 |
| **Dementia**, n (%) | No | 2803 (>99) | 31,604 (99) | Ref |
| Yes | 11 (<1) | 190 (1) | 0.170 |
| **Epilepsy**, n (%) | No | 2031 (72) | 21,663 (68) | Ref |
| Yes | 783 (28) | 10,131 (32) | <0.001 |
| **Liver disease** | No | 736 (97) | 30,829 (97) | Ref |
| Yes | 78 (3) | 965 (3) | 0.434 |
| **Rheumatoid arthritis** | No | 2694 (96) | 31,034 (98) | Ref |
| Yes | 120 (4) | 760 (2) | <0.001 |
| **Type 2 diabetes  mellitus**,n (%) | No | 2556 (91) | 27,939 (88) | Ref |
| Yes | 258 (9) | 3855 (12) | <0.001 |
| BMI, body mass index; OCS, oral corticosteroids; NA, not applicable; SD, standard deviation. | | | | |

| **Table S10. Univariable binary regression for variables in the hypertension risk cohort** (N = 86,305) | | | | |
| --- | --- | --- | --- | --- |
|  | | **Post-index hypertension** | |  |
| **Variable** | | **Yes** | **No** (control) | **P-value** |
| **Number** (%) | | 12,055 (14.0) | 74,250 (86.0) | NA |
| **Post-index follow-up** (mean years ± SD) | | 5.4 ± 4.4 | 7.8 ± 4.5 | <0.001 |
| **Age** (mean years ± SD) | | 55.8 ± 13.5 | 45.6 ± 17.4 | <0.001 |
| **Race/ethnicity**, n (%) | White | 8199 (68) | 48,785 (66) | Ref |
| Asian | 537 (4) | 3298 (4) | 0.510 |
| Black | 69 (1) | 391 (1) | 0.710 |
| Middle Eastern | 14 (<1) | 56 (<1) | 0.184 |
| Other/Mixed | 228 (2) | 1633 (2) | 0.010 |
| Declined/Unknown | 3008 (25) | 20,087 (27) | <0.001 |
| **Pre-index BMI** (mean kg/m2 ± SD) | | 29.5 ± 6.4 | 27.5 ± 6.3 | <0.001 |
| **Smoking status**, n (%) | Non-smoker | 4416 (37) | 30,099 (41) | Ref |
| Former smoker | 4967 (41) | 25,851 (35) | <0.001 |
| Current smoker | 2672 (22) | 18,300 (25) | 0.854 |
| **Ever prescribed OCS**,  n (%) | No | 213 (2) | 2260 (3) | Ref |
| Yes | 11,842 (98) | 71,990 (97) | <0.001 |
| **Pre-index OCS exposure, ever** (mean mg ± SD) | | 798 ± 2712 | 701 ± 2419 | <0.001 |
| **Pre-index OCS prescriptions category** (mean/year), n (%) | No OCS (none) | 5554 (46) | 30,556 (41) | Ref |
| Low OCS (<2) | 5973 (50) | 40,398 (54) | <0.001 |
| High OCS (≥2) | 528 (4) | 3296 (4) | 0.010 |
| **Post-index OCS prescriptions category** (mean/year), n (%) | No OCS (none) | 1769 (15) | 23,551 (32) | Ref |
| Low OCS (<2) | 8790 (73) | 45,126 (61) | <0.001 |
| High OCS (≥2) | 1496 (12) | 5573 (8) | <0.001 |
| **Change in OCS prescriptions category** (score), n (%) | No change (0) | 4861 (40) | 29,734 (40) | Ref |
| 2 category decrease (−2) | 19 (<1) | 219 (<1) | 0.008 |
| 1 category decrease (−1) | 1409 (12) | 17,857 (24) | <0.001 |
| 1 category increase (+1) | 5332 (44) | 25,303 (34) | <0.001 |
| 2 category increase (−2) | 434 (4) | 1137 (2) | <0.001 |
| **Anxiety/Depression**,  n (%) | No | 8010 (66) | 47,705 (64) | Ref |
| Yes | 4045 (34) | 26,545 (36) | <0.001 |
| **Type 2 diabetes  mellitus**, n (%) | No | 11,266 (93) | 71,240 (96) | Ref |
| Yes | 789 (7) | 3010 (4) | <0.001 |
| BMI, body mass index; OCS, oral corticosteroids; NA, not applicable; SD, standard deviation. | | | | |

| **Table S11. Univariable binary regression for variables in the pneumonia risk cohort** (N = 114,197) | | | | | |
| --- | --- | --- | --- | --- | --- |
|  | | **Post-index pneumonia** | |  |
| **Variable** | | **Yes** | **No** (control) | **P-value** |
| **Number** (%) | | 6193 (5.4) | 108,004 (94.6) | NA |
| **Post-index follow-up** (mean years ± SD) | | 6.7 ± 4.9 | 8.0 ± 4.6 | <0.001 |
| **Age** (mean years ± SD) | | 62.9 ± 15.6 | 51.0 ± 18.0 | <0.001 |
| **Gender**, n (%) | Male | 2530 (41) | 39,875 (37) | Ref |
| Female | 3663 (59) | 68,129 (63) | <0.001 |
| **Ever prescribed OCS**,  n (%) | No | 53 (1) | 2835 (3) | Ref |
| Yes | 6140 (99) | 105,169 (97) | <0.001 |
| **Pre-index OCS exposure, ever** (mean mg ± SD) | | 1519 ± 4291 | 775 ± 2591 | <0.001 |
| **Pre-index OCS prescriptions category** (mean/year), n (%) | No OCS (none) | 2282 (37) | 43,010 (40) | Ref |
| Low OCS (<2) | 3174 (51) | 59,726 (55) | 0.955 |
| High OCS (≥2) | 737 (12) | 5268 (5) | <0.001 |
| **Post-index OCS prescriptions category** (mean/year), n (%) | No OCS (none) | 684 (11) | 32,833 (30) | Ref |
| Low OCS (<2) | 3797 (61) | 66,287 (61) | <0.001 |
| High OCS (≥2) | 1712 (28) | 8884 (8) | <0.001 |
| **Change in OCS prescriptions category** (score), n (%) | No change (0) | 2656 (43) | 43,435 (40) | Ref |
| 2 category decrease (−2) | 19 (<1) | 395 (<1) | 0.309 |
| 1 category decrease (−1) | 640 (10) | 25,774 (24) | <0.001 |
| 1 category increase (+1) | 2505 (40) | 36,443 (34) | <0.001 |
| 2 category increase (−2) | 373 (6) | 1957 (2) | <0.001 |
| **Chronic kidney disease (any stage)**, n (%) | No | 5639 (91) | 103,187 (96) | Ref |
| Yes | 554 (9) | 4817 (4) | <0.001 |
| **Chronic obstructive pulmonary disease**, n (%) | No | 4424 (71) | 96,919 (90) | Ref |
| Yes | 1769 (29) | 11,085 (10) | <0.001 |
| **Dementia**, n (%) | No | 6153 (99) | 107,644 (>99) | Ref |
| Yes | 40 (1) | 360 (<1) | <0.001 |
| **Diabetes mellitus (any)**,  n (%) | No | 5331 (86) | 99,071 (92) | Ref |
| Yes | 862 (14) | 8933 (8) | <0.001 |
| **Epilepsy,** n (%) | No | 4461 (72) | 81,982 (76) | Ref |
| Yes | 1732 (28) | 26,022 (24) | <0.001 |
| **Heart failure,** n (%) | No | 5,881 (95) | 106,249 (98) | Ref |
| Yes | 312 (5) | 1755 (2) | <0.001 |
| **Hypertension**, n (%) | No | 3903 (63) | 82,354 (76) | Ref |
| Yes | 2290 (37) | 25,650 (24) | <0.001 |
| **Liver disease**, n (%) | No | 6012 (97) | 105,269 (97) | Ref |
|  | Yes | 181 (3) | 2735 (3) | 0.058 |
| **Pneumonia (diagnosis  >4 weeks pre-index**), n (%) | No | 5597 (90) | 103,392 (96) | Ref |
| Yes | 596 (10) | 4612 (4) | <0.001 |
| **Pneumococcal vaccine**,  n (%) | No | 4022 (65) | 83,140 (77) | Ref |
| Yes | 2171 (35) | 24,864 (23) | <0.001 |
| **Stroke,** n (%) | No | 5,811 (94) | 105,193 (97) | Ref |
| Yes | 382 (6) | 2811 (3) | <0.001 |
| OCS, oral corticosteroids; NA, not applicable; SD, standard deviation. | | | | |

| **Table S12. Univariable binary regression for variables in the anxiety/depression risk cohort** (N = 73,327) | | | | |
| --- | --- | --- | --- | --- |
|  | | **Post-index anxiety/depression** | |  |
| **Variable** | | **Yes** | **No** (control) | **P-value** |
| **Number** (%) | | 14,040 (19.1) | 59,287 (80.9) | NA |
| **Post-index follow-up** (mean years ± SD) | | 4.7 ± 4.0 | 7.9 ± 4.6 | <0.001 |
| **Age** (mean years ± SD) | | 45.7 ± 18.9 | 53.3 ± 18.8 | <0.001 |
| **Gender**, n (%) | Male | 4680 (33) | 27,306 (46) | Ref |
| Female | 9360 (67) | 31,981 (54) | <0.001 |
| **Race/ethnicity**, n (%) | White | 9066 (65) | 37,434 (63) | Ref |
| Asian | 560 (4) | 3128 (5) | <0.001 |
| Black | 60 (<1) | 400 (1) | <0.001 |
| Middle Eastern | 13 (<1) | 37 (<1) | 0.249 |
| Other/Mixed | 269 (2) | 1373 (2) | 0.002 |
| Declined/Unknown | 4072 (29) | 16,915 (29) | 0.775 |
| **Pre-index BMI** (mean kg/m2 ± SD) | | 28.1 ± 6.7 | 28.0 ± 6.1 | 0.128 |
| **Smoking status**, n (%) | Non-smoker | 5541 (39) | 25,784 (43) | Ref |
| Former smoker | 4825 (34) | 23,741 (40) | 0.010 |
| Current smoker | 3674 (26) | 9762 (16) | <0.001 |
| **Asthma duration** (mean years ± SD) | | 12.9 ± 10.7 | 13.8 ± 12.0 | <0.001 |
| **Ever prescribed OCS**,  n (%) | No | 340 (2) | 1704 (3) | Ref |
| Yes | 13,700 (98) | 57,583 (97) | 0.003 |
| **Pre-index OCS exposure, ever** (mean mg ± SD) | | 681 ± 2792 | 771 ± 2593 | <0.001 |
| **Pre-index OCS prescriptions category** (mean/year), n (%) | No OCS (none) | 6972 (50) | 24,468 (41) | Ref |
| Low OCS (<2) | 6456 (46) | 31,989 (54) | <0.001 |
| High OCS (≥2) | 612 (4) | 2830 (5) | <0.001 |
| **Post-index OCS prescriptions category** (mean/year), n (%) | No OCS (none) | 2541 (18) | 19,169 (32) | Ref |
| Low OCS (<2) | 9952 (71) | 35,214 (59) | <0.001 |
| High OCS (≥2) | 1547 (11) | 4904 (8) | <0.001 |
| **Change in OCS prescriptions category** (score), n (%) | No change (0) | 5494 (39) | 23,345 (39) | Ref |
| 2 category decrease (−2) | 18 (<1) | 234 (<1) | <0.001 |
| 1 category decrease (−1) | 1760 (13) | 14,522 (24) | <0.001 |
| 1 category increase (+1) | 6374 (45) | 20,009 (34) | <0.001 |
| 2 category increase (−2) | 394 (3) | 1177 (2) | <0.001 |
| **Chronic diseases**  (except asthma), n (%) | None | 9363 (67) | 38,422 (65) | Ref |
| 1 | 3451 (25) | 14,821 (25) | 0.040 |
| ≥2 | 1226 (9) | 6044 (10) | <0.001 |
| **Diabetes mellitus  (any)**, n (%) | No | 13,158 (94) | 54,326 (92) | Ref |
| Yes | 882 (6) | 4961 (8) | <0.001 |
| **Dementia**, n (%) | No | 14,026 (>99) | 59,106 (>99) | Ref |
| Yes | 14 (<1) | 181 (<1) | <0.001 |
| BMI, body mass index; OCS, oral corticosteroids; NA, not applicable; SD, standard deviation. | | | | |

| **Table S13. Univariable binary regression for variables in the BMI increase ≥1 mg/m2 risk cohort**  (N = 114,263) | | | | |
| --- | --- | --- | --- | --- |
|  | | **Post-index BMI increase (≥1 mg/m2)** | |  |
| **Variable** | | **Yes** | **No** (control) | **P-value** |
| **Number** (%) | | 15,695 (13.7) | 98,568 (86.3) | NA |
| **Post-index follow-up** (mean years ± SD) | | 5.6 ± 4.2 | 7.6 ± 4.3 | <0.001 |
| **Age** (mean years ± SD) | | 42.9 ± 16.3 | 53.1 ± 18.8 | <0.001 |
| **Gender**, n (%) | Male | 4056 (26) | 38,378 (39) | Ref |
| Female | 11,639 (74) | 60,190 (61) | <0.001 |
| **Race/ethnicity**, n (%) | White | 10,524 (67) | 64,687 (66) | Ref |
| Asian | 628 (4) | 4507 (5) | <0.001 |
| Black | 69 (<1) | 542 (1) | 0.056 |
| Middle Eastern | 11 (<1) | 75 (<2) | 0.748 |
| Other/Mixed | 317 (2) | 2126 (2) | 0.154 |
| Declined/Unknown | 4146 (26) | 26,631 (27) | 0.026 |
| **Pre-index BMI** (mean kg/m2 ± SD) | | 29.7 ± 7.7 | 28.3 ± 6.3 | <0.001 |
| **Smoking status**, n (%) | Non-smoker | 5883 (37) | 38,359 (39) | Ref |
| Former smoker | 5156 (33) | 39,696 (40) | <0.001 |
| Current smoker | 4656 (30) | 20,513 (21) | <0.001 |
| **Ever prescribed OCS**,  n (%) | No | 341 (2) | 2550 (3) | Ref |
| Yes | 15,354 (98) | 96,018 (97) | 0.002 |
| **Pre-index OCS exposure, ever** (mean mg ± SD) | | 703 ± 2531 | 834 ± 2747 | <0.001 |
| **Pre-index OCS prescriptions category** (mean/year), n (%) | No OCS (none) | 7874 (50) | 37,438 (38) | Ref |
| Low OCS (<2) | 7170 (46) | 55,760 (57) | <0.001 |
| High OCS (≥2) | 651 (4) | 5370 (5) | <0.001 |
| **Post-index OCS prescriptions category** (mean/year), n (%) | No OCS (none) | 2309 (15) | 31,220 (32) | Ref |
| Low OCS (<2) | 11,572 (74) | 58,554 (59) | <0.001 |
| High OCS (≥2) | 1814 (12) | 8794 (9) | <0.001 |
| **Change in OCS prescriptions category** (score), n (%) | No change (0) | 6204 (40) | 39,922 (41) | Ref |
| 2 category decrease (−2) | 19 (<1) | 396 (<1) | <0.001 |
| 1 category decrease (−1) | 1573 (10) | 24,854 (25) | <0.001 |
| 1 category increase (+1) | 7459 (48) | 31,504 (32) | <0.001 |
| 2 category increase (−2) | 440 (3) | 1892 (2) | <0.001 |
| **Anxiety/Depression**,  n (%) | No | 9265 (59) | 64,062 (65) | Ref |
| Yes | 6430 (41) | 34,506 (35) | <0.001 |
| BMI, body mass index; OCS, oral corticosteroids; NA, not applicable; SD, standard deviation. | | | | |

| **Table S14. Univariable binary regression for variables in the BMI increase ≥5 mg/m2 risk cohort**  (N = 114,263) | | | | |
| --- | --- | --- | --- | --- |
|  | | **Post-index BMI increase (≥5 mg/m2)** | |  |
| **Variable** | | **Yes** | **No** (control) | **P-value** |
| **Number** (%) | | 15,632 (13.7) | 98,631 (86.3) | NA |
| **Post-index follow-up** (mean years ± SD) | | 5.6 ± 4.2 | 7.6 ± 4.3 | <0.001 |
| **Age** (mean years ± SD) | | 42.8 ± 16.3 | 53.1 ± 18.0 | <0.001 |
| **Gender**, n (%) | Male | 4037 (26) | 38,397 (39) | Ref |
| Female | 11,595 (74) | 60,234 (61) | <0.001 |
| **Race/ethnicity**, n (%) | White | 10,476 (67) | 64,735 (66) | Ref |
| Asian | 626 (4) | 4,509 (5) | <0.001 |
| Black | 69 (<) | 542 (1) | 0.061 |
| Middle Eastern | 11 (<1) | 75 (<1) | 0.761 |
| Other/Mixed | 316 (2) | 2127 (2) | 0.162 |
| Declined/Unknown | 4134 (26) | 26,643 (27) | 0.033 |
| **Pre-index BMI** (mean kg/m2 ± SD) | | 29.6 ± 7.6 | 28.3 ±6.3 | <0.001 |
| **Smoking status**, n (%) | Non-smoker | 5855 (37) | 38,387 (39) | Ref |
| Former smoker | 5131 (33) | 39,721 (40) | <0.001 |
| Current smoker | 4646 (30) | 20,523 (21) | <0.001 |
| **Ever prescribed OCS**,  n (%) | No | 338 (2) | 2553 (3) | Ref |
| Yes | 15,294 (98) | 96,078 (97) | 0.002 |
| **Pre-index OCS exposure, ever** (mean mg ± SD) | | 702 ± 2532 | 834 ± 2747 | <0.001 |
| **Pre-index OCS prescriptions category** (mean/year), n (%) | No OCS (none) | 7849 (50) | 37,463 (38) | Ref |
| Low OCS (<2) | 7138 (46) | 55,792 (57) | <0.001 |
| High OCS (≥2) | 645 (4) | 5376 (5) | <0.001 |
| **Post-index OCS prescriptions category** (mean/year), n (%) | No OCS (none) | 2298 (15) | 31,231 (32) | Ref |
| Low OCS (<2) | 11,531 (74) | 58,595 (59) | <0.001 |
| High OCS (≥2) | 1803 (12) | 8805 (9) | <0.001 |
| **Change in OCS prescriptions category** (score), n (%) | No change (0) | 6175 (40) | 39,951 (41) | Ref |
| 2 category decrease (−2) | 18 (<1) | 397 (<1) | <0.001 |
| 1 category decrease (−1) | 1566 (10) | 24,861 (25) | <0.001 |
| 1 category increase (+1) | 7435 (48) | 31,528 (32) | <0.001 |
| 2 category increase (−2) | 438 (3) | 1894 (2) | <0.001 |
| **Anxiety/depression**,  n (%) | No | 9233 (59) | 64,094 (65) | Ref |
| Yes | 6399 (41) | 34,537 (35) | <0.001 |
| BMI, body mass index; OCS, oral corticosteroids; NA, not applicable; SD, standard deviation. | | | | |

| **Table S15. Univariable binary regression for variables in the cataracts risk cohort** (N = 109,409) | | | | |
| --- | --- | --- | --- | --- |
|  | | **Post-index cataracts** | |  |
| **Variable** | | **Yes** | **No** (control) | **P-value** |
| **Number** (%) | | 7469 (6.8) | 101,940 (93.2) | NA |
| **Post-index follow-up** (mean years ± SD) | | 6.3 ± 4.9 | 8.0 ± 4.5 | <0.001 |
| **Age** (mean years ± SD) | | 67.4 ± 10.6 | 49.4 (17.5) | <0.001 |
| **Gender**, n (%) | Male | 2724 (36) | 37,989 (37) | Ref |
| Female | 4745 (64) | 63,951 (63) | 0.170 |
| **Pre-index BMI** (mean kg/m2 ± SD) | | 28.9 ± 6.1 | 28.5 ± | <0.001 |
| **Smoking status**, n (%) | Non-smoker | 2457 (33) | 40,161 (39) | Ref |
| Former smoker | 3704 (50) | 38,527 (38) | <0.001 |
| Current smoker | 1308 (18) | 23,252 (23) | 0.010 |
| **Asthma duration** (mean years ± SD) | | 12.7 ± 12.9 | 13.9 ± 11.6 | <0.001 |
| **Ever prescribed OCS**,  n (%) | No | 90 (1) | 2735 (3) | Ref |
| Yes | 7379 (99) | 99,205 (97) | <0.001 |
| **Pre-index OCS exposure, ever** (mean mg ± SD) | |  |  |  |
| **Pre-index OCS prescriptions category** (mean/year), n (%) | No OCS (none) | 2997 (40) | 41,052 (40) | Ref |
| Low OCS (<2) | 3827 (51) | 56,104 (55) | 0.007 |
| High OCS (≥2) | 645 (9) | 4784 (5) | <0.001 |
| **Post-index OCS prescriptions category** (mean/year), n (%) | No OCS (none) | 1079 (14) | 30,876 (30) | Ref |
| Low OCS (<2) | 4843 (65) | 62,732 (62) | <0.001 |
| High OCS (≥2) | 1547 (21) | 8332 (8) | <0.001 |
| **Change in OCS prescriptions category** (score), n (%) | No change (0) | 3120 (42) | 40,878 (40) | Ref |
| 2 category decrease (−2) | 26 (<1) | 339 (<1) | 0.981 |
| 1 category decrease (−1) | 907 (12) | 24,087 (24) | <0.001 |
| 1 category increase (+1) | 3053 (41) | 34,783 (34) | <0.001 |
| 2 category increase (−2) | 363 (5) | 1853 (2) | <0.001 |
| **Diabetes mellitus  (any)**, n (%) | No | 6133 (82) | 94,737 (93) | Ref |
| Yes | 1336 (18) | 7203 (7) | <0.001 |
| **Glaucoma**, n (%) | No | 7158 (96) | 100,687 (99) | Ref |
| Yes | 311 (4) | 1253 (1) | <0.001 |
| **Hypertension**, n (%) |  | 4188 (56) | 79,971 (78) | Ref |
|  | 3281 (44) | 21,969 (22) | <0.001 |
| BMI, body mass index; OCS, oral corticosteroids; NA, not applicable; SD, standard deviation. | | | | |

| **Table S16. Univariable binary regression for variables in the cerebrovascular accident (stroke) risk cohort** (N = 111,066) | | | | |
| --- | --- | --- | --- | --- |
|  | | **Post-index stroke** | |  |
| **Variable** | | **Yes** | **No** (control) | **P-value** |
| **Number** (%) | | 3616 (3.3) | 107,450 (96.7) | NA |
| **Post-index follow-up** (mean years ± SD) | | 6.4 ± 4.8 | 8.0 ± 4.6 | <0.001 |
| **Age** (mean years ± SD) | | 65.9 ± 12.8 | 50.6 ± 17.9 | <0.001 |
| **Gender**, n (%) | Male | 1486 (41) | 39,583 (37) | Ref |
| Female | 2130 (59) | 67,867 (63) | <0.001 |
| **Race/ethnicity**, n (%) | White | 2390 (66) | 70,708 (66) | Ref |
| Asian | 123 (3) | 4896 (5) | 0.002 |
| Black | 14 (<1) | 590 (1) | 0.192 |
| Middle Eastern | 1 (<1) | 82 (<1) | 0.310 |
| Other/Mixed | 49 (1) | 2343 (2) | <0.001 |
| Declined/Unknown | 1039 (29) | 28,831 (27) | 0.090 |
| **Pre-index BMI** (mean kg/m2 ± SD) | | 28.7 ± 6.0 | 28.5 ± 6.6 | 0.027 |
| **Smoking status**, n (%) | Non-smoker | 1192 (33) | 42,192 (39) | Ref |
| Former smoker | 1723 (48) | 41,414 (39) | <0.001 |
| Current smoker | 701 (19) | 23,844 (22) | 0.410 |
| **Ever prescribed OCS**,  n (%) | No | 37 (1) | 2809 (3) | Ref |
| Yes | 3579 (99) | 104,641 (97) | <0.001 |
| **Pre-index OCS prescriptions category** (mean/year), n (%) | No OCS (none) | 1484 (41) | 42,889 (40) | Ref |
| Low OCS (<2) | 1852 (51) | 59,148 (55) | 0.005 |
| High OCS (≥2) | 280 (8) | 5413 (5) | <0.001 |
| **Post-index OCS prescriptions category** (mean/year), n (%) | No OCS (none) | 615 (17) | 31,910 (30) | Ref |
| Low OCS (<2) | 2358 (65) | 66,034 (61) | <0.001 |
| High OCS (≥2) | 643 (18) | 9506 (9) | <0.001 |
| **Change in OCS prescriptions category** (score), n (%) | No change (0) | 1446 (40) | 43,369 (40) | Ref |
| 2 category decrease (−2) | 13 (<1) | 372 (<1) | 0.868 |
| 1 category decrease (−1) | 533 (15) | 24,986 (23) | <0.001 |
| 1 category increase (+1) | 1457 (40) | 36,644 (34) | <0.001 |
| 2 category increase (−2) | 167 (5) | 2079 (2) | <0.001 |
| **Anxiety/depression**,  n (%) |  | 2386 (66) | 69,066 (64) | Ref |
|  | 1230 (34) | 38,384 (36) | 0.035 |
| **Atrial fibrillation** , n (%) | No | 3384 (94) | 104,895 (98) | Ref |
| Yes | 232 (6) | 2555 (2) | <0.001 |
| **Dyslipidaemia**, n (%) | No | 2034 (56) | 77,010 (72) | Ref |
| Yes | 1582 (44) | 30,440 (28) | <0.001 |
| **Heart failure**, n (%) | No | 3468 (96) | 105,767 (98) | Ref |
| Yes | 148 (4) | 1683 (2) | <0.001 |
| **Hypertension**, n (%) |  | 2010 (56) | 83,000 (77) | Ref |
|  | 1606 (44) | 24,450 (23) | <0.001 |
| **Type 2 diabetes  mellitus**, n (%) | No | 3113 (86) | 99,259 (92) | Ref |
| Yes | 503 (14) | 8191 (8) | <0.001 |
| BMI, body mass index; OCS, oral corticosteroids; NA, not applicable; SD, standard deviation. | | | | |

| **Table S17. Univariable binary regression for variables in the cerebro-cardiovascular disease risk cohort**  (N = 106,913) | | | | |
| --- | --- | --- | --- | --- |
|  | | **Post-index cerebro-cardiovascular diseasea** | |  |
| **Variable** | | **Yes** | **No** (control) | **P-value** |
| **Number** (%) | | 7936 (7.4) | 98,977 (92.6) | NA |
| **Post-index follow-up** (mean years ± SD) | | 6.4 ± 4.7 | 8 ± 4.6 | <0.001 |
| **Age** (mean years ± SD) | | 65.8 ± 12.7 | 49.2 ±17.6 | <0.001 |
| **Gender**, n (%) | Male | 3419 (43) | 35,356 (36) | Ref |
| Female | 4517 (57) | 63,621 (64) | <0.001 |
| **Race/ethnicity**, n (%) | White | 5150 (65) | 65,470 (66) | Ref |
| Asian | 311 (4) | 4489 (5) | 0.035 |
| Black | 33 (<1) | 564 (1) | 0.100 |
| Middle Eastern | 5 (<1) | 77 (<1) | 0.678 |
| Other/Mixed | 132 (2) | 2181 (2) | 0.004 |
| Declined/Unknown | 2305 (29) | 26,196 (26) | <0.001 |
| **Pre-index BMI** (mean kg/m2 ± SD) | | 29.2 ± 6.4 | 28.4 ± 6.6 | <0.001 |
| **Smoking status**, n (%) | Non-smoker | 2499 (31) | 39,880 (40) | Ref |
| Former smoker | 3793 (48) | 36,956 (37) | <0.001 |
| Current smoker | 1644 (21) | 22,141 (22) | <0.001 |
| **Ever prescribed OCS**,  n (%) | No | 76 (1) | 2,724 (3) | Ref |
| Yes | 7860 (99) | 96,253 (97) | <0.001 |
| **Pre-index OCS prescriptions category** (mean/year), n (%) | No OCS (none) | 3183 (40) | 39,922 (40) | Ref |
| Low OCS (<2) | 4095 (52) | 54,503 (55) | 0.015 |
| High OCS (≥2) | 658 (8) | 4552 (5) | <0.001 |
| **Post-index OCS prescriptions category** (mean/year), n (%) | No OCS (none) | 1192 (15) | 30,252 (31) | Ref |
| Low OCS (<2) | 5176 (65) | 60,868 (61) | <0.001 |
| High OCS (≥2) | 1568 (20) | 7857 (8) | <0.001 |
| **Change in OCS prescriptions category** (score), n (%) | No change (0) | 3251 (41) | 39,848 (40) | Ref |
| 2 category decrease (−2) | 25 (0) | 331 (<1) | 0.711 |
| 1 category decrease (−1) | 1047 (13) | 23,444 (24) | <0.001 |
| 1 category increase (+1) | 3228 (41) | 33,627 (34) | <0.001 |
| 2 category increase (−2) | 385 (5) | 1727 (2) | <0.001 |
| **Anxiety/depression**,  n (%) | No | 5369 (68) | 63,407 (64) | Ref |
| Yes | 2567 (32) | 35,570 (36) | <0.001 |
| **Atrial fibrillation**, n (%) | No | 7420 (93) | 97,453 (98) | Ref |
| Yes | 516 (7) | 1524 (2) | <0.001 |
| **Chronic kidney disease (any stage)**, n (%) | No | 7222 (91) | 95,661 (97) | Ref |
| Yes | 714 (9) | 3316 (3) | <0.001 |
| **Chronic obstructive pulmonary disease**, n (%) | No | 6222 (78) | 90,092 (91) | Ref |
| Yes | 1714 (22) | 8885 (9) | <0.001 |
| **Dyslipidaemia**, n (%) | No | 4602 (58) | 72,666 (73) | Ref |
| Yes | 3334 (42) | 26,311 (27) | <0.001 |
| **Hypertension**, n (%) | No | 4421 (56) | 78,559 (79) | Ref |
| Yes | 3515 (44) | 20,418 (21) | <0.001 |
| **Rheumatoid arthritis**,  n (%) | No | 7734 (97) | 97,684 (99) | Ref |
| Yes | 202 (3) | 1293 (1) | <0.001 |
| **Sleep apnoea**, n (%) | No | 7812 (98) | 97,812 (99) | Ref |
| Yes | 124 (2) | 1165 (1) | 0.003 |
| **Type 2 diabetes  mellitus**, n (%) | No | 6804 (86) | 92,413 (93) | Ref |
| Yes | 1132 (14) | 6564 (7) | <0.001 |
| BMI, body mass index; OCS, oral corticosteroids; NA, not applicable; SD, standard deviation.  aDiagnosis of any among: cerebrovascular accident, heart failure, myocardial infarction. | | | | |

| **Table S18. Univariable binary regression for variables in the dyslipidaemia risk cohort** (N = 80,383) | | | | |
| --- | --- | --- | --- | --- |
|  | | **Post-index dyslipidaemia** | |  |
| **Variable** | | **Yes** | **No** (control) | **P-value** |
| **Number** (%) | | 17,777 (22.1) | 62,606 (77.9) | NA |
| **Post-index follow-up** (mean years ± SD) | | 4.9 ± 4.2 | 7.7 ± 4.4 | <0.001 |
| **Age** (mean years ± SD) | | 52.2 ± 14.0 | 45.6 ± 18.8 | <0.001 |
| **Gender**, n (%) | Male | 6224 (35) | 22,760 (36) | Ref |
| Female | 11,553 (65) | 39,846 (64) | 0.001 |
| **Race/ethnicity**, n (%) | White | 12,175 (68) | 40,010 (64) | Ref |
| Asian | 795 (4) | 2457 (4) | 0.145 |
| Black | 83 (<1) | 392 (1) | 0.003 |
| Middle Eastern | 12 (<1) | 44 (<1) | 0.737 |
| Other/Mixed | 347 (2) | 1450 (2) | <0.001 |
| Declined/Unknown | 4365 (25) | 18,253 (29) | <0.001 |
| **Pre-index BMI** (mean kg/m2 ± SD) | | 28.9 ± 6.3 | 27.4 ± 6.5 | <0.001 |
| **Smoking status**, n (%) | Non-smoker | 6576 (37) | 26,346 (42) | Ref |
| Former smoker | 6777 (38) | 21,817 (35) | <0.001 |
| Current smoker | 4424 (25) | 14,443 (23) | <0.001 |
| **Ever prescribed OCS**,  n (%) | No | 336 (2) | 1927 (3) | Ref |
| Yes | 17,441 (98) | 60,679 (97) | <0.001 |
| **Pre-index OCS prescriptions category** (mean/year), n (%) | No OCS (none) | 8547 (48) | 26,098 (42) | Ref |
| Low OCS (<2) | 8419 (47) | 33,704 (54) | <0.001 |
| High OCS (≥2) | 811 (5) | 2804 (4) | 0.003 |
| **Post-index OCS prescriptions category** (mean/year), n (%) | No OCS (none) | 2639 (15) | 20,035 (32) | Ref |
| Low OCS (<2) | 12,931 (73) | 37,842 (60) | <0.001 |
| High OCS (≥2) | 2207 (12) | 4729 (8) | <0.001 |
| **Change in OCS prescriptions category** (score), n (%) | No change (0) | 6867 (39) | 25,043 (40) | Ref |
| 2 category decrease (−2) | 21 (<1) | 223 (<1) | <0.001 |
| 1 category decrease (−1) | 2067 (12) | 14,952 (24) | <0.001 |
| 1 category increase (+1) | 8231 (46) | 21,390 (34) | <0.001 |
| 2 category increase (−2) | 591 (3) | 998 (2) | <0.001 |
| **Hypertension**, n (%) | No | 14,663 (82) | 54,126 (86) | Ref |
| Yes | 3114 (18) | 8480 (14) | <0.001 |
| **Type 2 diabetes  mellitus**, n (%) | No | 17,013 (96) | 60,462 (97) | Ref |
| Yes | 764 (4) | 2144 (3) | <0.001 |
| BMI, body mass index; OCS, oral corticosteroids; NA, not applicable; SD, standard deviation. | | | | |

| **Table S19. Univariable binary regression for variables in the glaucoma risk cohort** (N = 112,210) | | | | | |
| --- | --- | --- | --- | --- | --- |
|  | | | **Post-index glaucoma** | |  |
| **Variable** | | | **Yes** | **No** (control) | **P-value** |
| **Number** (%) | | 1609 (1.4) | | 110,601 (98.6) | NA |
| **Post-index follow-up** (mean years ± SD) | | | 5.9 ± 4.8 | 8.1 ± 4.6 | <0.001 |
| **Age** (mean years ± SD) | | | 65.2 ± 12.3 | 51.1 ± 18.0 | <0.001 |
| **Gender**, n (%) | Male | | 636 (40) | 40,961 (37) | Ref |
| Female | | 973 (60) | 69,640 (63) | 0.040 |
| **Race/ethnicity**, n (%) | White | | 1076 (67) | 72,788 (66) | Ref |
| Asian | | 67 (4) | 4989 (5) | 0.449 |
| Black | | 10 (1) | 591 (1) | 0.673 |
| Middle Eastern | | 0 (0) | 84 (<1) | 0.914 |
| Other/Mixed | | 29 (2) | 2360 (2) | 0.329 |
| Declined/Unknown | | 427 (27) | 29,789 (27) | 0.593 |
| **Pre-index BMI** (mean kg/m2 ± SD) | | | 28.2 ± 5.7 | 28.5 ± 6.6 | 0.054 |
| **Smoking status**, n (%) | Non-smoker | | 577 (36) | 42,951 (39) | Ref |
| Former smoker | | 769 (48) | 42,965 (39) | <0.001 |
| Current smoker | | 263 (16) | 24,685 (22) | 0.002 |
| **Ever prescribed OCS**,  n (%) | No | | 19 (1) | 2836 (3) | Ref |
| Yes | | 1590 (99) | 107,765 (97) | <0.001 |
| **Pre-index OCS exposure, ever** (mean mg ± SD) | | | 1187 ± 3674 | 800 ± 2672 | <0.001 |
| **Pre-index OCS prescriptions category** (mean/year), n (%) | No OCS (none) | | 719 (45) | 43,950 (40) | Ref |
| Low OCS (<2) | | 773 (48) | 60,928 (55) | <0.001 |
| High OCS (≥2) | | 117 (7) | 5723 (5) | 0.027 |
| **Post-index OCS prescriptions category** (mean/year), n (%) | No OCS (none) | | 218 (14) | 32,685 (30) | Ref |
| Low OCS (<2) | | 1079 (67) | 67,894 (61) | <0.001 |
| High OCS (≥2) | | 312 (19) | 10,022 (9) | <0.001 |
| **Change in OCS prescriptions category** (score), n (%) | No change (0) | | 642 (40) | 44,606 (40) | Ref |
| 2 category decrease (−2) | | 6 (0) | 392 (0) | 0.882 |
| 1 category decrease (−1) | | 172 (11) | 25,718 (23) | <0.001 |
| 1 category increase (+1) | | 698 (43) | 37,704 (34) | <0.001 |
| 2 category increase (−2) | | 91 (6) | 2181 (2) | <0.001 |
| **Hypertension**, n (%) | No | | 986 (61) | 84,335 (76) | Ref |
| Yes | | 623 (39) | 26,266 (24) | <0.001 |
| **Sleep apnoea**, n (%) | No | | 1586 (99) | 109,164 (99) | Ref |
| Yes | | 23 (1) | 1437 (1) | 0.647 |
| **Type 2 diabetes  mellitus**, n (%) | No | | 1430 (89) | 101,824 (92) | Ref |
| Yes | | 179 (11) | 8777 (8) | <0.001 |
| BMI, body mass index; OCS, oral corticosteroid; NA, not applicable; SD, standard deviation. | | | | | |

| **Table S20. Univariable binary regression for variables in the heart failure risk cohort** (N = 112,193) | | | | | |
| --- | --- | --- | --- | --- | --- |
|  | | | **Post-index heart failure** | |  |
| **Variable** | | | **Yes** | **No** (control) | **P-value** |
| **Number** (%) | | 4110 (3.7) | | 108,083 (96.3) | NA |
| **Post-index follow-up** (mean years ± SD) | | | 6.7 ± 4.9 | 8.0 ± 4.6 | <0.001 |
| **Age** (mean years ± SD) | | | 68.4 ± 11.6 | 50.6 ± 17.9 | <0.001 |
| **Gender**, n (%) | Male | | 1892 (46) | 39,533 (37) | Ref |
| Female | | 2218 (54) | 68,550 (63) | <0.001 |
| **Pre-index BMI** (mean kg/m2 ± SD) | | | 29.9 ± 6.8 | 28.4 ± 6.5 | <0.001 |
| **Smoking status**, n (%) | Non-smoker | | 1228 (30) | 42,455 (39) | Ref |
| Former smoker | | 2145 (52) | 41,516 (38) | <0.001 |
| Current smoker | | 737 (18) | 24,112 (22) | 0.243 |
| **Ever prescribed OCS**,  n (%) | No | | 28 (1) | 2845 (3) | Ref |
| Yes | | 4082 (99) | 105,238 (97) | <0.001 |
| **Pre-index OCS exposure, ever** (mean mg ± SD) | | | 1272 ± 3710 | 784 ± 2654 | <0.001 |
| **Pre-index OCS prescriptions category** (mean/year), n (%) | No OCS (none) | | 1615 (39) | 43,181 (40) | Ref |
| Low OCS (<2) | | 2110 (51) | 59,555 (55) | 0.108 |
| High OCS (≥2) | | 385 (9) | 5347 (5) | <0.001 |
| **Post-index OCS prescriptions category** (mean/year), n (%) | No OCS (none) | | 502 (12) | 32,403 (30) | Ref |
| Low OCS (<2) | | 2671 (65) | 66,394 (61) | <0.001 |
| High OCS (≥2) | | 937 (23) | 9286 (9) | <0.001 |
| **Change in OCS prescriptions category** (score), n (%) | No change (0) | | 1705 (41) | 43,560 (40) | Ref |
| 2 category decrease (−2) | | 9 (<1) | 386 (<1) | 0.125 |
| 1 category decrease (−1) | | 469 (11) | 25,348 (23) | <0.001 |
| 1 category increase (+1) | | 1702 (41) | 36,741 (34) | <0.001 |
| 2 category increase (−2) | | 225 (5) | 2048 (2) | <0.001 |
| **Anxiety/depression**,  n (%) | No | | 2849 (69) | 69,155 (64) | Ref |
| Yes | | 1261 (31) | 38,928 (36) | <0.001 |
| **Chronic kidney disease (any stage)**, n (%) | No | | 3649 (89) | 103,686 (96) | Ref |
| Yes | | 461 (11) | 4397 (4) | <0.001 |
| **Dyslipidaemia**, n (%) | No | | 2324 (57) | 77,130 (71) | Ref |
| Yes | | 1786 (43) | 30,953 (29) | <0.001 |
| **Hypertension**, n (%) | No | | 2045 (50) | 83,332 (77) | Ref |
| Yes | | 2065 (50) | 24,751 (23) | <0.001 |
| **Myocardial infarction**,  n (%) | No | | 3675 (89) | 105,963 (98) | Ref |
| Yes | | 435 (11) | 2120 (2) | <0.001 |
| **Type 2 diabetes  mellitus**, n (%) | No | | 3394 (83) | 100,043 (93) | Ref |
| Yes | | 716 (17) | 8040 (7) | <0.001 |
| **Sleep apnoea,** n (%) | No | | 4034 (98) | 106,758 (99) | Ref |
| Yes | | 76 (2) | 1325 (1) | <0.001 |
| BMI, body mass index; OCS, oral corticosteroids; NA, not applicable; SD, standard deviation. | | | | | |

| **Table S21. Univariable binary regression for variables in the myocardial infarction risk cohort**  (N = 111,213) | | | | |
| --- | --- | --- | --- | --- |
|  | | **Post-index myocardial infarction** | |  |
| **Variable** | | **Yes** | **No** (control) | **P-value** |
| **Number** (%) | | 2565 (2.3) | 108,648 (97.7) | NA |
| **Post-index follow-up** (mean years ± SD) | | 6.2 ± 4.6 | 8.1 ± 4.6 | <0.001 |
| **Age** (mean years ± SD) | | 65.0 ± 12.7 | 50.8 ± 18.0 | <0.001 |
| **Gender**, n (%) | Male | 1275 (50) | 39,294 (36) | Ref |
| Female | 1290 (50) | 69,354 (64) | <0.001 |
| **Pre-index BMI** (mean kg/m2 ± SD) | | 28.7 ± 5.8 | 28.5 ± 6.6 | <0.001 |
| **Smoking status**, n (%) | Non-smoker | 716 (28) | 42,877 (39) | Ref |
| Former smoker | 1213 (47) | 41,834 (39) | <0.001 |
| Current smoker | 636 (25) | 23,937 (22) | <0.001 |
| **Ever prescribed OCS**,  n (%) | No | 25 (1) | 2827 (3) | Ref |
| Yes | 2540 (99) | 105,821 (97) | <0.001 |
| **Pre-index OCS exposure, ever** (mean mg ± SD) | | 1239 ± 3614 | 792 ± 2675 | <0.001 |
| **Pre-index OCS prescriptions category** (mean/year), n (%) | No OCS (none) | 1038 (40) | 43,259 (40) | Ref |
| Low OCS (<2) | 1289 (50) | 59,923 (55) | 0.010 |
| High OCS (≥2) | 238 (9) | 5466 (5) | <0.001 |
| **Post-index OCS prescriptions category** (mean/year), n (%) | No OCS (none) | 379 (15) | 32,382 (30) | Ref |
| Low OCS (<2) | 1654 (64) | 66,705 (61) | <0.001 |
| High OCS (≥2) | 532 (21) | 9561 (9) | <0.001 |
| **Change in OCS prescriptions category** (score), n (%) | No change (0) | 1042 (41) | 43,855 (40) | Ref |
| 2 category decrease (−2) | 16 (1) | 384 (0) | 0.029 |
| 1 category decrease (−1) | 322 (13) | 25,387 (23) | <0.001 |
| 1 category increase (+1) | 1063 (41) | 36,917 (34) | <0.001 |
| 2 category increase (−2) | 122 (5) | 2105 (2) | <0.001 |
| **Atrial fibrillation**, n (%) | No | 1941 (76) | 101,334 (93) | Ref |
| Yes | 624 (24) | 7314 (7) | <0.001 |
| **Chronic obstructive pulmonary disease**, n (%) | No | 1950 (76) | 97,377 (90) | Ref |
| Yes | 615 (24) | 11,271 (10) | <0.001 |
| **Dyslipidaemia**, n (%) | No | 1385 (54) | 77,795 (72) | Ref |
| Yes | 1180 (46) | 30,853 (28) | <0.001 |
| **Hypertension**, n (%) | No | 1449 (56) | 83,348 (77) | Ref |
| Yes | 1116 (44) | 25,300 (23) | <0.001 |
| **Rheumatoid arthritis**,  n (%) | No | 2494 (97) | 107,080 (99) | Ref |
| Yes | 71 (3) | 1568 (1) | <0.001 |
| **Sleep apnoea**, n (%) | No | 1385 (54) | 77,795 (72) | Ref |
| Yes | 1180 (46) | 30,853 (28) | <0.001 |
| **Stroke**, n (%) |  | 2426 (95) | 105,893 (97) | Ref |
|  | 139 (5) | 2755 (3) | <0.001 |
| **Type 2 diabetes  mellitus**, n (%) | No | 2138 (83) | 100,507 (93) | Ref |
| Yes | 427 (17) | 8141 (7) | <0.001 |
| BMI, body mass index; OCS, oral corticosteroids; NA, not applicable; SD, standard deviation. | | | | |

| **Table S22. Univariable binary regression for variables in the non-menopausal osteoporotic fractures risk cohort** (N = 76,796) | | | | | |
| --- | --- | --- | --- | --- | --- |
|  | | | **Post-index osteoporotic fractures** | |  |
| **Variable** | | | **Yes** | **No** (control) | **P-value** |
| **Number** (%) | | | 415 | 76,381 | NA |
| **Post-index follow-up** (mean years ± SD) | | | 7.7 ± 5.5 | 8.2 ± 4.7 | 0.066 |
| **Age** (mean years ± SD) | | | 65.1 ± 13.4 | 45.1 ± 17.4 | <0.001 |
| **Race/ethnicity**, n (%) | White | | 287 (69) | 49,385 (65) | Ref |
| Asian | | 11 (3) | 3782 (5) | 0.024 |
| Black | | 0 (0) | 468 (1) | 0.946 |
| Middle Eastern | | 0 (0) | 71 (<1) | 0.979 |
| Other/Mixed | | 4 (1) | 1783 (2) | 0.059 |
| Declined/Unknown | | 113 (27) | 20,892 (27) | 0.519 |
| **Pre-index BMI** (mean kg/m2 ± SD) | | | 26.4 ± 5.2 | 28.1 ± 6.4 | <0.001 |
| **Smoking status**, n (%) | | Non-smoker | 120 (29) | 29,945 (39) | Ref |
| Former smoker | 203 (49) | 28,276 (37) | <0.001 |
| Current smoker | 92 (22) | 18,160 (24) | 0.091 |
| **Ever prescribed OCS**,  n (%) | No | | 3 (1) | 2356 (3) | Ref |
| Yes | | 412 (99) | 74,025 (97) | 0.011 |
| **Pre-index OCS exposure, ever** (mean mg ± SD) | | | 1334 ± 3621 | 678 ± 2541 | <0.001 |
| **Pre-index OCS prescriptions category** (mean/year), n (%) | No OCS (none) | | 182 (44) | 33,060 (43) | Ref |
| Low OCS (<2) | | 191 (46) | 40,222 (53) | 0.155 |
| High OCS (≥2) | | 42 (10) | 3099 (4) | <0.001 |
| **Post-index OCS prescriptions category** (mean/year), n (%) | No OCS (none) | | 39 (9) | 23,392 (31) | Ref |
| Low OCS (<2) | | 269 (65) | 47,356 (62) | <0.001 |
| High OCS (≥2) | | 107 (26) | 5633 (7) | <0.001 |
| **Change in OCS prescriptions category** (score), n (%) | No change (0) | | 164 (40) | 29,999 (39) | Ref |
| 2 category decrease (−2) | | 0 (0) | 218 (<1) | 0.944 |
| 1 category decrease (−1) | | 36 (9) | 17,410 (23) | <0.001 |
| 1 category increase (+1) | | 186 (45) | 27,460 (36) | 0.046 |
| 2 category increase (−2) | | 29 (7) | 1294 (2) | <0.001 |
| **Chronic kidney disease (any stage)**, n (%) | No | | 383 (92) | 74,311 (97) | Ref |
| Yes | | 32 (8) | 2070 (3) | <0.001 |
| **Chronic obstructive pulmonary disease**, n (%) | No | | 294 (71) | 69,595 (91) | Ref |
| Yes | | 121 (29) | 6786 (9) | <0.001 |
| **Crohn’s disease**, n (%) | No | | 413 (>99) | 75,915 (99) | Ref |
| Yes | | 2 (<1) | 466 (1) | 0.739 |
| **Dementia**, n (%) | No | | 413 (>99) | 76,236 (>99) | Ref |
| Yes | | 2 (<1) | 145 (<1) | 0.190 |
| **Diabetes mellitus (any)**,  n (%) | No | | 379 (91) | 71,157 (93) | Ref |
| Yes | | 36 (9) | 5224 (7) | 0.141 |
| **Epilepsy**, n (%) | No | | 328 (79) | 60,696 (79) | Ref |
| Yes | | 87 (21) | 15,685 (21) | 0.829 |
| **Hormone replacement therapy,** n (%) | No | | 415 (100) | 76,307 (>99) | Ref |
| Yes | | 0 (0) | 74 (≤1) | 0.951 |
| **Liver disease**, n (%) | No | | 400 (96) | 74,649 (98) | Ref |
| Yes | | 15 (4) | 1732 (2) | 0.069 |
| **Osteoporosis**,  n (%) | No | | 362 (87) | 75,877 (99) | Ref |
| Yes | | 53 (13) | 504 (1) | <0.001 |
| **Rheumatoid arthritis**,  n (%) | No | | 405 (98) | 75,712 (99) | Ref |
| Yes | | 10 (2) | 669 (1) | 0.001 |
| **Stroke,** n (%) | No | | 378 (91) | 74,869 (98) | Ref |
| Yes | | 37 (9) | 1512 (2) | <0.001 |
| BMI, body mass index; OCS, oral corticosteroids; NA, not applicable; SD, standard deviation. | | | | | |

| **Table S23. Univariable binary regression for variables in the post-menopausal osteoporotic fractures risk cohort** (N = 36,553) | | | | |
| --- | --- | --- | --- | --- |
|  | | **Post-index osteoporotic fractures** | |  |
| **Variable** | | **Yes** | **No** (control) | **P-value** |
| **Number** (%) | | 1108 | 35,445 |  |
| **Years since menopause** (mean ± SD) | | 16.8 ± 10.0 | 13.2 ± 9.3 | <0.001 |
| **Post-index follow-up** (mean years ± SD) | | 6.3 ± 4.6 | 7.8 ± 4.4 | <0.001 |
| **Age** (mean years ± SD) | | 70.6 ± 9.5 | 64.5 ± 10.7 | <0.001 |
| **Race/ethnicity**, n (%) | White | 787 (71) | 24,114 (68) | Ref |
| Asian | 24 (2) | 1297 (4) | 0.007 |
| Black | 2 <1) | 140 (<1) | 0.247 |
| Middle Eastern | 0 (0) | 14 (<1) | 0.943 |
| Other/Mixed | 9 (1) | 628 (2) | 0.015 |
| Declined/Unknown | 286 (26) | 9252 (26) | 0.439 |
| **Pre-index BMI** (mean kg/m2 ± SD) | | 26.8 ± 5.3 | 29.4 ± 6.7 | <0.001 |
| **Smoking status**, n (%) | Non-smoker | 440 (40) | 13,415 (38) | Ref |
| Former smoker | 489 (44) | 15,418 (43) | 0.615 |
| Current smoker | 179 (16) | 6612 (19) | 0.033 |
| **Ever prescribed OCS**,  n (%) | No | 8 (1) | 515 (1) | Ref |
| Yes | 1100 (99) | 34,930 (99) | 0.048 |
| **Pre-index OCS exposure, ever** (mean mg ± SD) | | 1525 ± 3996 | 1051 ± 2889 | <0.001 |
| **Pre-index OCS prescriptions category** (mean/year), n (%) | No OCS (none) | 394 (36) | 11,462 (32) | Ref |
| Low OCS (<2) | 590 (53) | 21,366 (60) | <0.001 |
| High OCS (≥2) | 124 (11) | 2617 (7) | 0.002 |
| **Post-index OCS prescriptions category** (mean/year), n (%) | No OCS (none) | 144 (13) | 9690 (27) | Ref |
| Low OCS (<2) | 713 (64) | 21,283 (60) | <0.001 |
| High OCS (≥2) | 251 (23) | 4472 (13) | <0.001 |
| **Change in OCS prescriptions category** (score), n (%) | No change (0) | 515 (46) | 15,021 (42) | Ref |
| 2 category decrease (−2) | 3 (<1) | 178 (1) | 0.224 |
| 1 category decrease (−1) | 127 (11) | 8601 (24) | <0.001 |
| 1 category increase (+1) | 416 (38) | 10,706 (30) | 0.062 |
| 2 category increase (−2) | 47 (4) | 939 (3) | 0.015 |
| **Chronic kidney disease (any stage)**, n (%) | No | 985 (89) | 32,450 (92) | Ref |
| Yes | 123 (11) | 2995 (8) | 0.002 |
| **Chronic obstructive pulmonary disease**, n (%) | No | 862 (78) | 29,979 (85) | Ref |
| Yes | 246 (22) | 5466 (15) | <0.001 |
| **Crohn’s disease**, n (%) | No | 1096 (99) | 35,210 (99) | Ref |
| Yes | 12 (1) | 235 (1) | 0.096 |
| **Dementia**, n (%) | No | 1100 (99) | 35,218 (99) | Ref |
| Yes | 8 (1) | 227 (1) | 0.738 |
| **Diabetes mellitus (any)**,  n (%) | No | 999 (90) | 31,128 (88) | Ref |
| Yes | 109 (10) | 4317 (12) | 0.019 |
| **Epilepsy**, n (%) | No | 765 (69) | 24,136 (68) | Ref |
| Yes | 343 (31) | 11,309 (32) | 0.504 |
| **Hormone replacement therapy,** n (%) | No | 964 (87) | 29,383 (83) | Ref |
| Yes | 144 (13) | 6062 (17) | <0.001 |
| **Liver disease**, n (%) | No | 1063 (96) | 34,370 (97) | Ref |
| Yes | 45 (4) | 1075 (3) | 0.051 |
| **Osteoporosis**,  n (%) | No | 801 (72) | 33,637 (95) | Ref |
| Yes | 307 (28) | 1808 (5) | <0.001 |
| **Rheumatoid arthritis**,  n (%) | No | 1060 (96) | 34,481 (97) | Ref |
| Yes | 48 (4) | 964 (3) | 0.001 |
| **Stroke,** n (%) | No | 1048 (95) | 33,943 (96) | Ref |
| Yes | 60 (5) | 1502 (4) | 0.057 |
| BMI, body mass index; OCS, oral corticosteroids; NA, not applicable; SD, standard deviation. | | | | |

| **Table S24. Univariable binary regression for variables in the peptic ulcer risk cohort** (N = 111,131) | | | | |
| --- | --- | --- | --- | --- |
|  | | **Post-index peptic ulcer** | |  |
| **Variable** | | **Yes** | **No** (control) | **P-value** |
| **Number** (%) | | 1301 (1.2) | 109,830 (98.8) | NA |
| **Post-index follow-up** (mean years ± SD) | | 6.4 ± 4.6 | 8.1 ± 4.6 | <0.001 |
| **Age** (mean years ± SD) | | 60.7 ± 14.1 | 51.2 ± 18.1 | <0.001 |
| **Gender**, n (%) | Male | 544 (42) | 40,272 (37) | Ref |
| Female | 757 (58) | 69,558 (63) | <0.001 |
| **Pre-index BMI** (mean kg/m2 ± SD) | | 29.0 ± 6.0 | 28.5 ± 6.6 | 0.005 |
| **Smoking status**, n (%) | Non-smoker | 427 (33) | 43,072 (39) | Ref |
| Former smoker | 581 (45) | 42,607 (39) | <0.001 |
| Current smoker | 293 (23) | 24,151 (22) | 0.008 |
| **Ever prescribed OCS**,  n (%) | No | 14 (1) | 2833 (3) | Ref |
| Yes | 1287 (99) | 106,997 (97) | <0.001 |
| **Pre-index OCS exposure, ever** (mean mg ± SD) | | 918 ± 2793 | 804 ± 2703 | 0.126 |
| **Pre-index OCS prescriptions category** (mean/year), n (%) | No OCS (none) | 563 (43) | 43,699 (40) | Ref |
| Low OCS (<2) | 663 (51) | 60,453 (55) | 0.005 |
| High OCS (≥2) | 75 (6) | 5678 (5) | 0.840 |
| **Post-index OCS prescriptions category** (mean/year), n (%) | No OCS (none) | 189 (15) | 32,587 (30) | Ref |
| Low OCS (<2) | 890 (68) | 67,327 (61) | <0.001 |
| High OCS (≥2) | 222 (17) | 9916 (9) | <0.001 |
| **Change in OCS prescriptions category** (score), n (%) | No change (0) | 520 (40) | 44,255 (40) | Ref |
| 2 category decrease (−2) | 2 (<1) | 395 (<1) | 0.236 |
| 1 category decrease (−1) | 164 (13) | 25,602 (23) | <0.001 |
| 1 category increase (+1) | 541 (42) | 37,414 (34) | <0.001 |
| 2 category increase (−2) | 74 (6) | 2164 (2) | <0.001 |
| BMI, body mass index; OCS, oral corticosteroids; NA, not applicable; SD, standard deviation. | | | | |

| **Table S25. Univariable binary regression for variables in the renal impairment (CKD, stage ≥3a) risk cohort** (N = 109,571**)** | | | | |
| --- | --- | --- | --- | --- |
|  | | **Post-index CKD, stage ≥3a** | |  |
| **Variable** | | **Yes** | **No** (control) | **P-value** |
| **Number** (%) | | 7029 (6.4) | 102,542 (93.6) | NA |
| **Post-index follow-up** (mean years ± SD) | | 5.5 ± 4.5 | 8.0 ± 4.6 | <0.001 |
| **Age** (mean years ± SD) | | 67.8 ± 11.2 | 49.6 ± 17.6 | <0.001 |
| **Gender**, n (%) | Male | 2541 (36) | 38,348 (37) | Ref |
| Female | 4488 (64) | 64,194 (63) | 0.037 |
| **Race/ethnicity**, n (%) | White | 4538 (65) | 67,589 (66) | Ref |
| Asian | 197 (3) | 4752 (5) | <0.001 |
| Black | 31 (<1) | 565 (1) | 0.275 |
| Middle Eastern | 7 (<1) | 77 (<1) | 0.443 |
| Other/Mixed | 104 (1) | 2250 (2) | <0.001 |
| Declined/Unknown | 2152 (31) | 27,309 (27) | <0.001 |
| **Pre-index BMI** (mean kg/m2 ± SD) | | 29.7 ± 6.3 | 28.3 ± 6.6 | <0.001 |
| **Smoking status**, n (%) | Non-smoker | 2298 (33) | 40,408 (39) | Ref |
| Former smoker | 3616 (51) | 38,630 (38) | <0.001 |
| Current smoker | 1115 (16) | 23,504 (23) | <0.001 |
| **Ever prescribed OCS**,  n (%) | No | 59 (1) | 2778 (3) | Ref |
| Yes | 6970 (99) | 99,764 (97) | <0.001 |
| **Pre-index OCS exposure, ever** (mean mg ± SD) | | 1099 ± 3363 | 762 ± 2593 | <0.001 |
| **Pre-index OCS prescriptions category** (mean/year), n (%) | No OCS (none) | 3026 (43) | 41,165 (40) | Ref |
| Low OCS (<2) | 3494 (50) | 56,425 (55) | <0.001 |
| High OCS (≥2) | 509 (7) | 4952 (5) | <0.001 |
| **Post-index OCS prescriptions category** (mean/year), n (%) | No OCS (none) | 912 (13) | 30,946 (30) | Ref |
| Low OCS (<2) | 4746 (68) | 63,028 (61) | <0.001 |
| High OCS (≥2) | 1371 (20) | 8568 (8) | <0.001 |
| **Change in OCS prescriptions category** (score), n (%) | No change (0) | 2845 (40) | 41,183 (40) | Ref |
| 2 category decrease (−2) | 22 (<1) | 334 (<1) | 0.829 |
| 1 category decrease (−1) | 770 (11) | 24,171 (24) | <0.001 |
| 1 category increase (+1) | 2994 (43) | 35,034 (34) | <0.001 |
| 2 category increase (−2) | 398 (6) | 1820 (2) | <0.001 |
| **Hypertension**, n (%) | No | 3462 (49) | 81,437 (79) | Ref |
| Yes | 3567 (51) | 21,105 (21) | <0.001 |
| **Dyslipidaemia**, n (%) | No | 3927 (56) | 74,762 (73) | Ref |
| Yes | 3102 (44) | 27,780 (27) | <0.001 |
| **Type 2 diabetes  mellitus**, n (%) | No | 5785 (82) | 95,690 (93) | Ref |
| Yes | 1244 (18) | 6852 (7) | <0.001 |
| **Sleep apnoea**, n (%) | No | 6943 (99) | 101,242 (99) | Ref |
| Yes | 86 (1) | 1300 (1) | 0.748 |
| CKD, chronic kidney disease; BMI, body mass index; OCS, oral corticosteroids; NA, not applicable; SD, standard deviation. | | | | |

| **Table S26. Univariable binary regression for variables in the sleep apnoea risk cohort** (N = 112,783) | | | | |
| --- | --- | --- | --- | --- |
|  | | **Post-index sleep apnoea** | |  |
| **Variable** | | **Yes** | **No** (control) | **P-value** |
| **Number** (%) | | 1875 (1.7) | 110,908 (98.3) | NA |
| **Post-index follow-up** (mean years ± SD) | | 5.8 ±4.5 | 8.1 ± 4.6 | <0.001 |
| **Age** (mean years ± SD) | | 49.9 ± 12.9 | 51.6 ± 18.2 | <0.001 |
| **Gender**, n (%) | Male | 928 (49) | 40,584 (37) | Ref |
| Female | 947 (51) | 70,324 (63) | <0.001 |
| **Race/ethnicity**, n (%) | White | 1299 (69) | 72,870 (66) | Ref |
| Asian | 95 (5) | 4970 (4) | 0.515 |
| Black | 8 (<1) | 598 (1) | 0.421 |
| Middle Eastern | 3 (<1) | 82 (<1) | 0.222 |
| Other/Mixed | 41 (2) | 2353 (2) | 0.887 |
| Declined/Unknown | 429 (23) | 30,035 (27) | <0.001 |
| **Pre-index BMI** (mean kg/m2 ± SD) | | 35.0 ± 8.1 | 28.3 ± 6.4 | <0.001 |
| **Smoking status**, n (%) | Non-smoker | 608 (32) | 43,186 (39) | Ref |
| Former smoker | 794 (42) | 43,296 (39) | <0.001 |
| Current smoker | 473 (25) | 24,426 (22) | <0.001 |
| **Ever prescribed OCS**,  n (%) | No | 25 (1) | 2845 (3) | Ref |
| Yes | 1850 (99) | 108,063 (97) | <0.001 |
| **Pre-index OCS prescriptions category** (mean/year), n (%) | No OCS (none) | 794 (42) | 44,151 (40) | Ref |
| Low OCS (<2) | 968 (52) | 61,020 (55) | 0.009 |
| High OCS (≥2) | 113 (6) | 5737 (5) | 0.370 |
| **Post-index OCS prescriptions category** (mean/year), n (%) | No OCS (none) | 249 (13) | 32,767 (30) | Ref |
| Low OCS (<2) | 1319 (70) | 68,027 (61) | <0.001 |
| High OCS (≥2) | 307 (16) | 10,114 (9) | <0.001 |
| **Change in OCS prescriptions category** (score), n (%) | No change (0) | 779 (42) | 44,710 (40) | Ref |
| 2 category decrease (−2) | 1 (<1) | 400 (<1) | 0.053 |
| 1 category decrease (−1) | 209 (11) | 25,740 (23) | <0.001 |
| 1 category increase (+1) | 822 (44) | 37,815 (34) | <0.001 |
| 2 category increase (−2) | 64 (3) | 2243 (2) | <0.001 |
| BMI, body mass index; OCS, oral corticosteroids; NA, not applicable; SD, standard deviation. | | | | |

| **Table S27. Multivariable Cox proportional hazard model for anxiety/depression** | | |
| --- | --- | --- |
| **Variable** | **Hazard ratio** (95% CI) | **P-value** |
| **Age** (1 year increment) | 0.976 (0.975, 0.977) | <0.001 |
| **Gender** |  | <0.001 |
| Male | 1 (Ref) |  |
| Female | 1.563 (1.500, 1.628) |  |
| **BMI increase** (by ≥1 kg/m2 vspre-index)a | 1.008 (1.005, 1.011) | <0.001 |
| **Ethnicity** |  | <0.001 |
| White | 1 (Ref) |  |
| Asian | 0.828 (0.750, 0.914) |  |
| Black | 0.718 (0.539, 0.958) |  |
| Middle Eastern | 1.406 (0.756, 2.615) |  |
| Other/Mixed | 0.860 (0.749, 0.989) |  |
| Declined/Unknown | 0.991 (0.950, 1.034) |  |
| **Smoking status** |  | <0.001 |
| Non-smoker | 1 (Ref) |  |
| Former smoker | 1.147 (1.096, 1.202) |  |
| Smoker | 1.497 (1.426, 1.572) |  |
| **Asthma duration** (years) | 0.996 (0.995, 0.998) | <0.001 |
| **Pre-index OCS prescriptions category** (mean/year) |  | <0.001 |
| No OCS (none) | 1 (Ref) |  |
| Low OCS (<2) | 1.367 (1.283, 1.457) |  |
| High OCS (≥2) | 1.852 (1.651, 2.078) |  |
| **Change in OCS prescriptions category** (score) |  | <0.001 |
| No change (0) | 1 (Ref) |  |
| 2 category decrease (−2) | 0.657 (0.399, 1.082) |  |
| 1 category decrease (−1) | 0.815 (0.765, 0.868) |  |
| 1 category increase (+1) | 1.249 (1.174, 1.328) |  |
| 2 category increase (+2) | 1.698 (1.490, 1.936) |  |
| **Chronic diseases (excluding asthma)** |  | <0.001 |
| 0 | 1 (Ref) |  |
| 1 | 1.341 (1.277, 1.409) |  |
| ≥2 | 1.645 (1.517, 1.785) |  |
| **Diabetes mellitus (any)** |  | 0.006 |
| No | 1 (Ref) |  |
| Yes | 0.883 (0.808, 0.965) |  |
| BMI, body mass index; OCS, oral corticosteroids.  aBMI increase by ≥1 kg/m2 compared to the last BMI in the 5 years preceding the index date. | | |

| **Table S28. Multivariable Cox proportional hazard model for BMI increase ≥1 mg/m2** | | |
| --- | --- | --- |
| **Variable** | **Hazard ratio** (95% CI) | **P-value** |
| **Age** (1 year increment) | 0.966 (0.965, 0.967) | <0.001 |
| **Gender** |  | <0.001 |
| Male | 1 (Ref) |  |
| Female | 1.512 (1.449, 1.577) |  |
| **BMI increase** (by ≥1 kg/m2 vspre-index)a | 1.036 (1.034, 1.039) | <0.001 |
| **Smoking status** |  | <0.001 |
| Non-smoker | 1 (Ref) |  |
| Former smoker | 1.083 (1.036, 1.132) |  |
| Smoker | 1.243 (1.187, 1.300) |  |
| **Pre-index OCS prescriptions category** (mean/year) |  | <0.001 |
| No OCS (none) | 1 (Ref) |  |
| Low OCS (<2) | 1.435 (1.349, 1.527) |  |
| High OCS (≥2) | 2.148 (1.920, 2.403) |  |
| **Change in OCS prescriptions category** (score) |  | <0.001 |
| No change (0) | 1 (Ref) |  |
| 2 category decrease (−2) | 0.783 (0.476, 1.290) |  |
| 1 category decrease (−1) | 0.687 (0.643, 0.734) |  |
| 1 category increase (+1) | 1.442 (1.357, 1.533) |  |
| 2 category increase (+2) | 2.123 (1.873, 2.407) |  |
| **Anxiety/depression** |  | <0.001 |
| No | 1 (Ref) |  |
| Yes | 1.266 (1.218, 1.316) |  |
| BMI, body mass index; OCS, oral corticosteroids.  aBMI increase by ≥1 kg/m2 compared to the last BMI in the 5 years preceding the index date. | | |

| **Table S29. Multivariable Cox proportional hazard model for BMI increase ≥5 mg/m2** | | |
| --- | --- | --- |
| **Variable** | **Hazard ratio** (95% CI) | **P-value** |
| **Age** (1 year increment) | 0.966 (0.964, 0.967) | <0.001 |
| **Gender** |  | <0.001 |
| Male | 1 (Ref) |  |
| Female | 1.514 (1.451, 1.579) |  |
| **BMI increase** (by ≥1 kg/m2 vspre-index)a | 1.035 (1.033, 1.038) | <0.001 |
| **Smoking status** |  | <0.001 |
| Non-smoker | 1 (Ref) |  |
| Former smoker | 1.085 (1.038, 1.134) |  |
| Smoker | 1.245 (1.190, 1.303) |  |
| **Pre-index OCS prescriptions category** (mean/year) |  | <0.001 |
| No OCS (none) | 1 (Ref) |  |
| Low OCS (<2) | 1.438 (1.351, 1.530) |  |
| High OCS (≥2) | 2.148 (1.920, 2.404) |  |
| **Change in OCS prescriptions category** (score) |  | <0.001 |
| No change (0) | 1 (Ref) |  |
| 2 category decrease (−2) | 0.733 (0.438, 1.226) |  |
| 1 category decrease (−1) | 0.685 (0.641, 0.732) |  |
| 1 category increase (+1) | 1.446 (1.361, 1.537) |  |
| 2 category increase (+2) | 2.133 (1.882, 2.419) |  |
| **Anxiety/depression** |  | <0.001 |
| No | 1 (Ref) |  |
| Yes | 1.267 (1.219, 1.317) |  |
| BMI, body mass index; OCS, oral corticosteroids.  aBMI increase by ≥1 kg/m2 compared to the last BMI in the 5 years preceding the index date. | | |

| **Table S30. Multivariable Cox proportional hazard model for cataracts** | | |
| --- | --- | --- |
| **Variable** | **Hazard ratio** (95% CI) | **P-value** |
| **Age** (1 year increment) | 1.083 (1.081, 1.086) | <0.001 |
| **Gender** |  | 0.008 |
| Male | 1 (Ref) |  |
| Female | 1.078 (1.020, 1.139) |  |
| **BMI increase** (by ≥1 kg/m2 vspre-index)a | 1.012 (1.008, 1.017) | <0.001 |
| **Smoking status** |  | <0.001 |
| Non-smoker | 1 (Ref) |  |
| Former smoker | 1.131 (1.065, 1.201) |  |
| Smoker | 1.313 (1.213, 1.420) |  |
| **Pre-index OCS prescriptions category** (mean/year) |  | <0.001 |
| No OCS (none) | 1 (Ref) |  |
| Low OCS (<2) | 1.512 (1.386, 1.649) |  |
| High OCS (≥2) | 2.215 (1.944, 2.523) |  |
| **Change in OCS prescriptions category** (score) |  | <0.001 |
| No change (0) | 1 (Ref) |  |
| 2 category decrease (−2) | 0.628 (0.391, 1.007) |  |
| 1 category decrease (−1) | 0.845 (0.774, 0.922) |  |
| 1 category increase (+1) | 1.368 (1.254, 1.492) |  |
| 2 category increase (+2) | 1.918 (1.654, 2.224) |  |
| **Glaucoma** |  | <0.001 |
| No | 1 (Ref) |  |
| Yes | 1.304 (1.146, 1.485) |  |
| **Hypertension** |  | 0.002 |
| No | 1 (Ref) |  |
| Yes | 1.097 (1.036, 1.161) |  |
| **Diabetes mellitus (any)** |  | <0.001 |
| No | 1 (Ref) |  |
| Yes | 1.886 (1.755, 2.027) |  |
| BMI, body mass index; OCS, oral corticosteroids.  aBMI increase by ≥1 kg/m2 compared to the last BMI in the 5 years preceding the index date. | | |

| **Table S31. Multivariable Cox proportional hazard model for cerebrovascular accident (stroke)** | | |
| --- | --- | --- |
| **Variable** | **Hazard ratio** (95% CI) | **P-value** |
| **Age** (1 year increment) | 1.064 (1.061, 1.068) | <0.001 |
| **Gender** |  | <0.001 |
| Male | 1 (Ref) |  |
| Female | 0.783 (0.723, 0.847) |  |
| **Smoking status** |  | <0.001 |
| Non-smoker | 1 (Ref) |  |
| Former smoker | 1.002 (0.918, 1.093) |  |
| Smoker | 1.289 (1.153, 1.440) |  |
| **Pre-index OCS prescriptions category** (mean/year) |  | <0.001 |
| No OCS (none) | 1 (Ref) |  |
| Low OCS (<2) | 1.174 (1.033, 1.334) |  |
| High OCS (≥2) | 1.538 (1.268, 1.866) |  |
| **Change in OCS prescriptions category** (score) |  | 0.005 |
| No change (0) | 1 (Ref) |  |
| 2 category decrease (−2) | 1.011 (0.563, 1.814) |  |
| 1 category decrease (−1) | 1.084 (0.962, 1.222) |  |
| 1 category increase (+1) | 1.153 (1.013, 1.311) |  |
| 2 category increase (+2) | 1.508 (1.212, 1.876) |  |
| **Anxiety/Depression** |  | <0.001 |
| No | 1 (Ref) |  |
| Yes | 1.213 (1.116, 1.318) |  |
| **Atrial fibrillation** |  | <0.001 |
| No | 1 (Ref) |  |
| Yes | 1.361 (1.163, 1.592) |  |
| **Dyslipidaemia** |  | <0.001 |
| No | 1 (Ref) |  |
| Yes | 1.238 (1.140, 1.344) |  |
| **Hypertension** |  | <0.001 |
| No | 1 (Ref) |  |
| Yes | 1.274 (1.171, 1.386) |  |
| **Type 2 diabetes mellitus** |  | 0.003 |
| No | 1 (Ref) |  |
| Yes | 1.189 (1.060, 1.332) |  |
| OCS, oral corticosteroids. | | |

| **Table S32. Multivariable Cox proportional hazard model for cerebro-cardiovascular disease**a | | |
| --- | --- | --- |
| **Variable** | **Hazard ratio** (95% CI) | **P-value** |
| **Age** (1 year increment) | 1.070 (1.068, 1.072) | <0.001 |
| **Gender** |  | <0.001 |
| Male | 1 (Ref) |  |
| Female | 0.677 (0.642, 0.715) |  |
| **BMI increase** (by ≥1 kg/m2 vspre-index)a | 1.025 (1.020, 1.029) | <0.001 |
| **Ethnicity** |  | <0.001 |
| White | 1 (Ref) |  |
| Asian | 1.240 (1.076, 1.430) |  |
| Black | 1.530 (1.061, 2.207) |  |
| Middle Eastern | 1.000 (0.415, 2.406) |  |
| Other/Mixed | 0.995 (0.812, 1.218) |  |
| Declined/Unknown | 1.108 (1.046, 1.172) |  |
| **Smoking status** |  | <0.001 |
| Non-smoker | 1 (Ref) |  |
| Former smoker | 1.090 (1.026, 1.159) |  |
| Smoker | 1.516 (1.406, 1.635) |  |
| **Pre-index OCS prescriptions category** (mean/year) |  | <0.001 |
| No OCS (none) | 1 (Ref) |  |
| Low OCS (<2) | 1.417 (1.302, 1.542) |  |
| High OCS (≥2) | 2.176 (1.914, 2.475) |  |
| **Change in OCS prescriptions category** (score) |  | <0.001 |
| No change (0) | 1 (Ref) |  |
| 2 category decrease (−2) | 0.481 (0.288, 0.806) |  |
| 1 category decrease (−1) | 0.969 (0.892, 1.052) |  |
| 1 category increase (+1) | 1.349 (1.240, 1.468) |  |
| 2 category increase (+2) | 1.855 (1.600, 2.149) |  |
| **Anxiety/Depression** |  | <0.001 |
| No | 1 (Ref) |  |
| Yes | 1.145 (1.082, 1.212) |  |
| **Atrial fibrillation** |  | <0.001 |
| No | 1 (Ref) |  |
| Yes | 1.738 (1.566, 1.928) |  |
| **Chronic obstructive pulmonary disease** |  | 0.001 |
| No | 1 (Ref) |  |
| Yes | 1.118 (1.044, 1.196) |  |
| **Chronic kidney disease (any stage)** |  | <0.001 |
| No | 1 (Ref) |  |
| Yes | 1.211 (1.103, 1.328) |  |
| **Dyslipidaemia** |  | <0.001 |
| No | 1 (Ref) |  |
| Yes | 1.117 (1.056, 1.181) |  |
| **Hypertension** |  | <0.001 |
| No | 1 (Ref) |  |
| Yes | 1.230 (1.161, 1.303) |  |
| **Rheumatoid arthritis** |  | 0.024 |
| No | 1 (Ref) |  |
| Yes | 1.210 (1.025, 1.428) |  |
| **Sleep apnoea** |  | 0.006 |
| No | 1 (Ref) |  |
| Yes | 1.330 (1.086, 1.629) |  |
| **Type 2 diabetes mellitus** |  | <0.001 |
| No | 1 (Ref) |  |
| Yes | 1.261 (1.167, 1.363) |  |
| BMI, body mass index; OCS, oral corticosteroids.  aDiagnosis of any among: cerebrovascular accident, heart failure, myocardial infarction.  bBMI increase by ≥1 kg/m2 compared to the last BMI in the 5 years preceding the index date. | | |

| **Table S33. Multivariable Cox proportional hazard model for dyslipidaemia** | | |
| --- | --- | --- |
| **Variable** | **Hazard ratio** (95% CI) | **P-value** |
| **Age** (1 year increment) | 1.022 (1.021, 1.023) | <0.001 |
| **BMI increase** (by ≥1 kg/m2 vspre-index)a | 1.032 (1.030, 1.035) | <0.001 |
| **Ethnicity** |  | <0.001 |
| White | 1 (Ref) |  |
| Asian | 1.447 (1.331, 1.573) |  |
| Black | 0.944 (0.741, 1.204) |  |
| Middle Eastern | 1.149 (0.598, 2.209) |  |
| Other/Mixed | 1.063 (0.940, 1.203) |  |
| Declined/Unknown | 0.821 (0.788, 0.854) |  |
| **Smoking status** |  | <0.001 |
| Non-smoker | 1 (Ref) |  |
| Former smoker | 1.068 (1.026, 1.112) |  |
| Smoker | 1.242 (1.188, 1.299) |  |
| **Pre-index OCS prescriptions category** (mean/year) |  | <0.001 |
| No OCS (none) | 1 (Ref) |  |
| Low OCS (<2) | 1.194 (1.128, 1.263) |  |
| High OCS (≥2) | 1.379 (1.248, 1.523) |  |
| **Change in OCS prescriptions category** (score) |  | <0.001 |
| No change (0) | 1 (Ref) |  |
| 2 category decrease (−2) | 0.441 (0.264, 0.736) |  |
| 1 category decrease (−1) | 0.821 (0.775, 0.869) |  |
| 1 category increase (+1) | 1.255 (1.186, 1.328) |  |
| 2 category increase (+2) | 1.476 (1.322, 1.648) |  |
| **Hypertension** |  | <0.001 |
| No | 1 (Ref) |  |
| Yes | 0.874 (0.832, 0.918) |  |
| BMI, body mass index; OCS, oral corticosteroids.  aBMI increase by ≥1 kg/m2 compared to the last BMI in the 5 years preceding the index date. | | |

| **Table S34. Multivariable Cox proportional hazard model for glaucoma** | | |
| --- | --- | --- |
| **Variable** | **Hazard ratio** (95% CI) | **P-value** |
| **Age** (1 year increment) | 1.061 (1.056, 1.065) | <0.001 |
| **Pre-index OCS prescriptions category** (mean/year) |  | 0.002 |
| No OCS (none) | 1 (Ref) |  |
| Low OCS (<2) | 1.290 (1.075, 1.547) |  |
| High OCS (≥2) | 1.667 (1.248, 2.227) |  |
| **Change in OCS prescriptions category** (score) |  | <0.001 |
| No change (0) | 1 (Ref) |  |
| 2 category decrease (−2) | 0.739 (0.270, 2.019) |  |
| 1 category decrease (−1) | 0.768 (0.631, 0.934) |  |
| 1 category increase (+1) | 1.392 (1.159, 1.673) |  |
| 2 category increase (+2) | 2.311 (1.725, 3.097) |  |
| OCS, oral corticosteroids. | | |

| **Table S35. Multivariable Cox proportional hazard model for heart failure** | | |
| --- | --- | --- |
| **Variable** | **Hazard ratio** (95% CI) | **P-value** |
| **Age** (1 year increment) | 1.083 (1.079, 1.087) | <0.001 |
| **Gender** |  | <0.001 |
| Male | 1 (Ref) |  |
| Female | 0.690 (0.641, 0.743) |  |
| **BMI increase** (by ≥1 kg/m2 vspre-index)a | 1.045 (1.039, 1.051) | <0.001 |
| **Smoking status** |  | <0.001 |
| Non-smoker | 1 (Ref) |  |
| Former smoker | 1.153 (1.062, 1.253) |  |
| Smoker | 1.472 (1.322, 1.640) |  |
| **Pre-index OCS prescriptions category** (mean/year) |  | <0.001 |
| No OCS (none) | 1 (Ref) |  |
| Low OCS (<2) | 1.658 (1.48, 1.858) |  |
| High OCS (≥2) | 2.913 (2.463, 3.444) |  |
| **Change in OCS prescriptions category** (score) |  | <0.001 |
| No change (0) | 1 (Ref) |  |
| 2 category decrease (−2) | 0.346 (0.163, 0.733) |  |
| 1 category decrease (−1) | 0.805 (0.713, 0.909) |  |
| 1 category increase (+1) | 1.530 (1.365, 1.715) |  |
| 2 category increase (+2) | 2.238 (1.837, 2.727) |  |
| **Chronic kidney disease (any stage)** |  | 0.002 |
| No | 1 (Ref) |  |
| Yes | 1.209 (1.074, 1.361) |  |
| **Hypertension** |  | <0.001 |
| No | 1 (Ref) |  |
| Yes | 1.330 (1.232, 1.436) |  |
| **Myocardial infarction** |  | <0.001 |
| No | 1 (Ref) |  |
| Yes | 2.367 (2.111, 2.655) |  |
| **Sleep apnoea** |  | 0.013 |
| No | 1 (Ref) |  |
| Yes | 1.406 (1.075, 1.841) |  |
| **Type 2 diabetes mellitus** |  | <0.001 |
| No | 1 (Ref) |  |
| Yes | 1.367 (1.240, 1.507) |  |
| BMI, body mass index; OCS, oral corticosteroids.  aBMI increase by ≥1 kg/m2 compared to the last BMI in the 5 years preceding the index date. | | |

| **Table S36. Multivariable Cox proportional hazard model for myocardial infarction** | | |
| --- | --- | --- |
| **Variable** | **Hazard ratio** (95% CI) | **P-value** |
| **Age** (1 year increment) | 1.051 (1.047, 1.055) | <0.001 |
| **Gender** |  | <0.001 |
| Male | 1 (Ref) |  |
| Female | 0.600 (0.547, 0.658) |  |
| **Smoking status** |  | <0.001 |
| Non-smoker | 1 (Ref) |  |
| Former smoker | 1.150 (1.029, 1.285) |  |
| Smoker | 1.822 (1.600, 2.074) |  |
| **Pre-index OCS prescriptions category** (mean/year) |  | <0.001 |
| No OCS (none) | 1 (Ref) |  |
| Low OCS (<2) | 1.481 (1.277, 1.718) |  |
| High OCS (≥2) | 2.251 (1.801, 2.813) |  |
| **Change in OCS prescriptions category** (score) |  | <0.001 |
| No change (0) | 1 (Ref) |  |
| 2 category decrease (−2) | 1.057 (0.557, 2.005) |  |
| 1 category decrease (−1) | 0.912 (0.786, 1.058) |  |
| 1 category increase (+1) | 1.421 (1.226, 1.646) |  |
| 2 category increase (+2) | 2.009 (1.554, 2.597) |  |
| **Atrial fibrillation** |  | <0.001 |
| No | 1 (Ref) |  |
| Yes | 1.709 (1.532, 1.907) |  |
| **Chronic obstructive pulmonary disease** |  | <0.001 |
| No | 1 (Ref) |  |
| Yes | 1.228 (1.094, 1.378) |  |
| **Dyslipidaemia** |  | <0.001 |
| No | 1 (Ref) |  |
| Yes | 1.370 (1.243, 1.511) |  |
| **Hypertension** |  | <0.001 |
| No | 1 (Ref) |  |
| Yes | 1.193 (1.079, 1.320) |  |
| **Rheumatoid arthritis** |  | 0.007 |
| No | 1 (Ref) |  |
| Yes | 1.442 (1.105, 1.880) |  |
| **Type 2 diabetes mellitus** |  | <0.001 |
| No | 1 (Ref) |  |
| Yes | 1.582 (1.395, 1.793) |  |
| BMI, body mass index; OCS, oral corticosteroids. | | |

| **Table S37. Multivariable Cox proportional hazard model for non-menopausal osteoporosis** | | |
| --- | --- | --- |
| **Variable** | **Hazard ratio** (95% CI) | **P-value** |
| **Age** (1 year increment) | 1.073 (1.068, 1.078) | <0.001 |
| **Gender** |  | <0.001 |
| Male | 1 (Ref) |  |
| Female | 3.034 (2.608, 3.531) |  |
| **BMI increase** (by ≥1 kg/m2 vspre-index)a | 0.914 (0.901, 0.927) | <0.001 |
| **Smoking status** |  | <0.001 |
| Non-smoker | 1 (Ref) |  |
| Former smoker | 1.088 (0.932, 1.270) |  |
| Smoker | 1.466 (1.231, 1.746) |  |
| **Pre-index OCS prescriptions category** (mean/year) |  | <0.001 |
| No OCS (none) | 1 (Ref) |  |
| Low OCS (<2) | 2.471 (2.015, 3.031) |  |
| High OCS (≥2) | 7.176 (5.290, 9.735) |  |
| **Change in OCS prescriptions category** (score) |  | <0.001 |
| No change (0) | 1 (Ref) |  |
| 2 category decrease (−2) | 0.001 (0.000, 208475076.296) |  |
| 1 category decrease (−1) | 0.577 (0.448, 0.745) |  |
| 1 category increase (+1) | 1.959 (1.596, 2.406) |  |
| 2 category increase (+2) | 4.016 (2.872, 5.616) |  |
| **Rheumatoid arthritis** |  | <0.001 |
| No | 1 (Ref) |  |
| Yes | 2.194 (1.557, 3.09) |  |
| **Liver disease** |  | <0.001 |
| No | 1 (Ref) |  |
| Yes | 2.221 (1.597, 3.088) |  |
| BMI, body mass index; OCS, oral corticosteroid.  aBMI increase by ≥1 kg/m2 compared to the last BMI in the 5 years preceding the index date. | | |

| **Table S38. Multivariable Cox proportional hazard model for non-menopausal osteoporotic fractures** | | |
| --- | --- | --- |
| **Variable** | **Hazard ratio** (95% CI) | **P-value** |
| **Age** (1 year increment) | 1.080 (1.071, 1.089) | <0.001 |
| **BMI increase** (by ≥1 kg/m2 vspre-index)a | 0.957 (0.934, 0.980) | <0.001 |
| **Smoking status** |  | <0.001 |
| Non-smoker | 1 (Ref) |  |
| Former smoker | 0.920 (0.699, 1.211) |  |
| Smoker | 1.675 (1.229, 2.282) |  |
| **Pre-index OCS prescriptions category** (mean/year) |  | <0.001 |
| No OCS (none) | 1 (Ref) |  |
| Low OCS (<2) | 2.067 (1.448, 2.952) |  |
| High OCS (≥2) | 4.359 (2.539, 7.485) |  |
| **Change in OCS prescriptions category** (score) |  | <0.001 |
| No change (0) | 1 (Ref) |  |
| 2 category decrease (−2) | 0.010 (0.000, 4348.004) |  |
| 1 category decrease (−1) | 0.760 (0.488, 1.185) |  |
| 1 category increase (+1) | 1.789 (1.247, 2.567) |  |
| 2 category increase (+2) | 4.194 (2.398, 7.337) |  |
| **Osteoporosis** |  | <0.001 |
| No | 1 (Ref) |  |
| Yes | 6.911 (4.707, 10.147) |  |
| BMI, body mass index; OCS, oral corticosteroid.  aBMI increase by ≥1 kg/m2 compared to the last BMI in the 5 years preceding the index date. | | |

| **Table S39. Multivariable Cox proportional hazard model for post-menopausal osteoporotic fractures** | | |
| --- | --- | --- |
| **Variable** | **Hazard ratio** (95% CI) | **P-value** |
| **Years since menopause** | 1.047 (1.040, 1.055) | <0.001 |
| **BMI increase** (by ≥1 kg/m2 vspre-index)a | 0.952 (0.940, 0.965) | <0.001 |
| **Pre-index OCS prescriptions category** (mean/year) |  | <0.001 |
| No OCS (none) | 1 (Ref) |  |
| Low OCS (<2) | 1.400 (1.116, 1.756) |  |
| High OCS (≥2) | 2.161 (1.572, 2.971) |  |
| **Change in OCS prescriptions category** (score) |  | 0.003 |
| No change (0) | 1 (Ref) |  |
| 2 category decrease (−2) | 0.340 (0.084, 1.383) |  |
| 1 category decrease (−1) | 0.733 (0.580, 0.927) |  |
| 1 category increase (+1) | 1.283 (1.026, 1.605) |  |
| 2 category increase (+2) | 1.496 (0.992, 2.257) |  |
| **Chronic kidney disease (any stage)** |  | 0.004 |
| No | 1 (Ref) |  |
| Yes | 1.393 (1.110, 1.749) |  |
| **Chronic obstructive pulmonary disease** |  | 0.015 |
| No | 1 (Ref) |  |
| Yes | 1.237 (1.042, 1.467) |  |
| **Liver disease** |  | <0.001 |
| No | 1 (Ref) |  |
| Yes | 1.869 (1.317, 2.654) |  |
| **Osteoporosis** |  | <0.001 |
| No | 1 (Ref) |  |
| Yes | 5.590 (4.764, 6.559) |  |
| BMI, body mass index; OCS, oral corticosteroid.  aBMI increase by ≥1 kg/m2 compared to the last BMI in the 5 years preceding the index date. | | |

| **Table S40. Multivariable Cox proportional hazard model for peptic ulcer** | | |
| --- | --- | --- |
| **Variable** | **Hazard ratio** (95% CI) | **P-value** |
| **Age** (1 year increment) | 1.039 (1.034, 1.043) | <0.001 |
| **Gender** |  | <0.001 |
| Male | 1 (Ref) |  |
| Female | 0.761 (0.669, 0.866) |  |
| **BMI increase** (by ≥1 kg/m2 vspre-index)a | 1.014 (1.004, 1.025) | 0.005 |
| **Smoking status** |  | <0.001 |
| Non-smoker | 1 (Ref) |  |
| Former smoker | 1.106 (0.953, 1.282) |  |
| Smoker | 1.408 (1.182, 1.677) |  |
| **Pre-index OCS prescriptions category** (mean/year) |  | 0.012 |
| No OCS (none) | 1 (Ref) |  |
| Low OCS (<2) | 1.350 (1.096, 1.663) |  |
| High OCS (≥2) | 1.511 (1.068, 2.138) |  |
| **Change in OCS prescriptions category** (score) |  | <0.001 |
| No change (0) | 1 (Ref) |  |
| 2 category decrease (−2) | 0.315 (0.043, 2.278) |  |
| 1 category decrease (−1) | 0.875 (0.707, 1.083) |  |
| 1 category increase (+1) | 1.269 (1.031, 1.563) |  |
| 2 category increase (+2) | 1.996 (1.403, 2.838) |  |
| BMI, body mass index; OCS, oral corticosteroid.  aBMI increase by ≥1 kg/m2 compared to the last BMI in the 5 years preceding the index date. | | |

| **Table S41. Multivariable Cox proportional hazard model for renal impairment (CKD stage ≥3a)** | | |
| --- | --- | --- |
| **Variable** | **Hazard ratio** (95% CI) | **P-value** |
| **Age** (1 year increment) | 1.081 (1.079, 1.084) | <0.001 |
| **Gender** |  | 0.004 |
| Male | 1 (Ref) |  |
| Female | 1.089 (1.028, 1.154) |  |
| **BMI increase** (by ≥1 kg/m2 vspre-index)a | 1.033 (1.028, 1.037) | <0.001 |
| **Ethnicity** |  | <0.001 |
| White | 1 (Ref) |  |
| Asian | 0.875 (0.741, 1.033) |  |
| Black | 1.455 (0.965, 2.195) |  |
| Middle Eastern | 1.353 (0.507, 3.609) |  |
| Other/Mixed | 0.815 (0.647, 1.026) |  |
| Declined/Unknown | 1.127 (1.062, 1.196) |  |
| **Smoking status** |  | <0.001 |
| Non-smoker | 1 (Ref) |  |
| Former smoker | 1.156 (1.086, 1.231) |  |
| Smoker | 1.218 (1.120, 1.324) |  |
| **Pre-index OCS prescriptions category** (mean/year) |  | <0.001 |
| No OCS (none) | 1 (Ref) |  |
| Low OCS (<2) | 1.277 (1.170, 1.394) |  |
| High OCS (≥2) | 1.625 (1.417, 1.865) |  |
| **Change in OCS prescriptions category** (score) |  | <0.001 |
| No change (0) | 1 (Ref) |  |
| 2 category decrease (−2) | 0.595 (0.366, 0.969) |  |
| 1 category decrease (−1) | 0.709 (0.646, 0.778) |  |
| 1 category increase (+1) | 1.405 (1.287, 1.535) |  |
| 2 category increase (+2) | 2.126 (1.838, 2.458) |  |
| **Hypertension** |  | <0.001 |
| No | 1 (Ref) |  |
| Yes | 1.546 (1.458, 1.638) |  |
| **Type 2 diabetes mellitus** |  | <0.001 |
| No | 1 (Ref) |  |
| Yes | 1.638 (1.520, 1.765) |  |
| BMI, body mass index; CKD, chronic kidney disease; OCS, oral corticosteroid.  aBMI increase by ≥1 kg/m2 compared to the last BMI in the 5 years preceding the index date. | | |

| **Table S42. Multivariable Cox proportional hazard model for sleep apnoea** | | |
| --- | --- | --- |
| **Variable** | **Hazard ratio** (95% CI) | **P-value** |
| **Age** (1 year increment) | 0.993 (0.989, 0.996) | <0.001 |
| **Gender** |  | <0.001 |
| Male | 1 (Ref) |  |
| Female | 0.462 (0.415, 0.514) |  |
| **BMI increase** (by ≥1 kg/m2 vspre-index)a | 1.107 (1.103, 1.112) | <0.001 |
| **Ethnicity** |  | <0.001 |
| White | 1 (Ref) |  |
| Asian | 1.110 (0.853, 1.445) |  |
| Black | 0.652 (0.271, 1.572) |  |
| Middle Eastern | 1.941 (0.485, 7.776) |  |
| Other/Mixed | 1.085 (0.749, 1.570) |  |
| Declined/Unknown | 0.754 (0.664, 0.857) |  |
| **Smoking status** |  | 0.003 |
| Non-smoker | 1 (Ref) |  |
| Former smoker | 1.230 (1.086, 1.393) |  |
| Smoker | 1.181 (1.025, 1.361) |  |
| **Pre-index OCS prescriptions category** (mean/year) |  | <0.001 |
| No OCS (none) | 1 (Ref) |  |
| Low OCS (<2) | 1.809 (1.516, 2.159) |  |
| High OCS (≥2) | 2.989 (2.249, 3.972) |  |
| **Change in OCS prescriptions category** (score) |  | <0.001 |
| No change (0) | 1 (Ref) |  |
| 2 category decrease (−2) | 0.216 (0.030, 1.533) |  |
| 1 category decrease (−1) | 0.692 (0.577, 0.831) |  |
| 1 category increase (+1) | 1.529 (1.283, 1.824) |  |
| 2 category increase (+2) | 2.493 (1.787, 3.479) |  |
| BMI, body mass index; OCS, oral corticosteroid.  aBMI increase by ≥1 kg/m2 compared to the last BMI in the 5 years preceding the index date. | | |

| **Table S43. Model validation tests for 15 OCS-related adverse outcomes** | | | | | | | |
| --- | --- | --- | --- | --- | --- | --- | --- |
| **Outcome** | **Dataset** | **Regression on Prognostic Index** | | **Check model misspecification** | | **Harrell’s *c*-index** | **Gönen & Heller’s  K statistic** |
| **Slope** (SE) | **P-value** | **χ2** (DF) | **P-value** |
| **Anxiety/ depression** | Training (n=54,996) |  |  |  |  | 0.645 | 0.636 |
| Validation (n=18,331) | 1.05 (0.04) | 0.12 | 20.3 (20) | 0.44 | 0.652 | 0.636 |
| **BMI increase**  (≥1 kg/m2) | Training (n=85,698) |  |  |  |  | 0.695 | 0.683 |
| Validation (n=28,565) | 1.00 (0.02) | 0.91 | 19.4 (12) | 0.08 | 0.693 | 0.683 |
| **BMI increase**  (≥5 kg/m2) | Training (n=85,698) |  |  |  |  | 0.695 | 0.684 |
| Validation (n=28,565) | 0.99 (0.02) | 0.80 | 19.4 (12) | 0.08 | 0.693 | 0.683 |
| **Cataracts** | Training (n=82,059) |  |  |  |  | 0.840 | 0.796 |
| Validation (n=27,350) | 1.04 (0.02) | 0.10 | 18.9 (14) | 0.17 | 0.849 | 0.796 |
| **Cerebrovascular  accident** (stroke) | Training (n=83,301) |  |  |  |  | 0.789 | 0.766 |
| Validation (n=27,765) | 0.98 (0.04) | 0.54 | 14.9 (15) | 0.46 | 0.789 | 0.765 |
| **Cerebro-cardiovascular disease**a | Training (n=80,187) |  |  |  |  | 0.813 | 0.781 |
| Validation (n=26,726) | 0.97 (0.02) | 0.16 | 38.6 (25) | 0.04 | 0.809 | 0.781 |
| **Dyslipidaemia** | Training (n=60,288) |  |  |  |  | 0.655 | 0.649 |
| Validation (n=20,095) | 0.97 (0.03) | 0.30 | 17.0 (16) | 0.38 | 0.628 | 0.628 |
| **Glaucoma** | Training (n=84,159) |  |  |  |  | 0.774 | 0.742 |
| Validation (n=28,051) | 1.04 (0.06) | 0.54 | 11.8 (7) | 0.11 | 0.779 | 0.742 |
| **Heart failure** | Training (n=84,147) |  |  |  |  | 0.849 | 0.808 |
| Validation (n=28,046) | 0.98 (0.03) | 0.44 | 23.1 (16) | 0.11 | 0.846 | 0.808 |
| **Myocardial  infarction** | Training (n=83,412) |  |  |  |  | 0.799 | 0.756 |
| Validation (n=27,801) | 0.99 (004) | 0.70 | 14.0 (16) | 0.60 | 0.795 | 0.756 |
| **Non-menopausal osteoporotic fractures** | Training (n=57,597) |  |  |  |  | 0.894 | 0.783 |
| Validation (n=19,119) | 0.99 (0.07) | 0.87 | 34.6 (11) | <0.001 | 0.885 | 0.783 |
| **Post-menopausal osteoporotic fractures** | Training (n=27,417) |  |  |  |  | 0.778 | 0.681 |
| Validation (n=9136) | 0.91 (0.05) | 0.12 | 13.8 (12) | 0.32 | 0.750 | 0.680 |
| **Peptic ulcer** | Training (n=83,349) |  |  |  |  | 0.687 | 0.687 |
| Validation (n=27,782) | 1.04 (0.09) | 0.66 | 9.6 (11) | 0.57 | 0.697 | 0.687 |
| **Renal impairment** (CKD, stage ≥3a) | Training (n=82,179) |  |  |  |  | 0.845 | 0.801 |
| Validation (n=27,392) | 0.95 (0.02) | 0.02 | 27.9 (18) | 0.06 | 0.831 | 0.802 |
| **Sleep apnoea** | Training (n=84,588) |  |  |  |  | 0.796 | 0.810 |
| Validation (n=28,195) | 1.10 (0.04) | 0.01 | 38.3 (16) | <0.001 | 0.690 | 0.688 |
| OCS, oral corticosteroid; BMI, body mass index; CKD, chronic kidney disease; SE, standard error; DF, degrees of freedom.  aDiagnosis of any among: cerebrovascular accident, heart failure, myocardial infarction. | | | | | | | |

| **Table S44. Anxiety/depression: predicted risk by change in mean annual OCS prescription category** (with all other factors held constant) | | | | | | | | | | | | | | | | | |
| --- | --- | --- | --- | --- | --- | --- | --- | --- | --- | --- | --- | --- | --- | --- | --- | --- | --- |
| **Example patient  profile** | **Mean pre-index OCS prescription category** | | **Comorbidities** | | | | | **Post-index change in mean annual OCS prescriptions** | **Risk of post-index outcome** | | | | | | | | |
| Yes | | | No | | 5 years | 10 years | | | 15 years | | 20 years | | |
| - 51-year-old white man - Pre-index BMI: 22.6 kg/m2 - Non-smoker - Asthma duration 9.2 years | - <2/year (low) | | - 1 chronic disease (excluding  asthma) | | | - Diabetes (any) | | 1 category decrease | 8.94% | 16.17% | | | 22.03% | | 26.72% | | |
| No change | 10.86% | 19.47% | | | 26.33% | | 31.72% | | |
| 1 category increase | 13.37% | 23.70% | | | 31.72% | | 37.91% | | |
| OCS, oral corticosteroids; BMI, body mass index. | | | | | | | | | | | | | | | | | |
|  | | | | | | | | | | | | | | | | | |
| **Table S45. BMI increase ≥1 mg/m2: predicted risk by change in mean annual OCS prescription category** (with all other factors held constant) | | | | | | | | | | | | | | | | | |
| **Example patient  profile** | | **Mean pre-index OCS prescription category** | | **Comorbidities** | | | | **Post-index change in mean annual OCS prescriptions** | **Risk of post-index outcome** | | | | | | | | |
| Yes | | | No | 5 years | | 10 years | | | 15 years | | 20 years | | |
| - 51-year-old man - Pre-index BMI: 22.6 kg/m2 - Non-smoker | | - <2/year (low) | |  | | | - Anxiety/ depression | 1 category decrease | 2.97% | | 6.55% | | | 10.23% | | 14.02% | | |
| No change | 4.29% | | 9.39% | | | 14.54% | | 19.74% | | |
| 1 category increase | 6.13% | | 13.25% | | | 20.27% | | 27.18% | | |
| OCS, oral corticosteroids; BMI, body mass index. | | | | | | | | | | | | | | | | | |
|  | | | | | | | | | | | | | | | | | |
| **Table S46. BMI increase ≥5 mg/m2: predicted risk by change in mean annual OCS prescription category** (with all other factors held constant) | | | | | | | | | | | | | | | | | |
| **Example patient  profile** | | **Mean pre-index OCS prescription category** | | **Comorbidities** | | | | **Post-index change in mean annual OCS prescriptions** | **Risk of post-index outcome** | | | | | | | | |
| Yes | | No | | 5 years | | 10 years | | | 15 years | | 20 years | |
| - 51-year-old man - Pre-index BMI: 22.6 kg/m2 - Non-smoker | | - <2/year (low) | |  | | - Anxiety/ depression | | 1 category decrease | 2.95% | 6.49% | | | | 10.14% | | | 13.91% |
| No change | 4.27% | 9.33% | | | | 14.44% | | | 19.64% |
| 1 category increase | 6.12% | 13.20% | | | | 20.2% | | | 27.11% |
| OCS, oral corticosteroids; BMI, body mass index. | | | | | | | | | | | | | | | | | |
|  | | | | | | | | | | | | | | | | | |
| **Table S47. Cataracts: predicted risk by change in mean annual OCS prescription category** (with all other factors held constant) | | | | | | | | | | | | | | | | | |
| **Example patient  profile** | | **Mean pre-index OCS prescription category** | | | **Comorbidities** | | | **Post-index change in mean annual OCS prescriptions** | **Risk of post-index outcome** | | | | | | | | |
| Yes | No | | 5 years | | | 10 years | | 15 years | | 20 years | |
| - 51-year-old woman - Pre-index BMI: 22.8 kg/m2 - Ex-smoker | | - <2/year (low) | | |  | - Diabetes (any) - Glaucoma - Hypertension | | 1 category decrease | 1.18% | | 3.10% | | | 6.35% | | 11.56% | |
| No change | 1.39% | | | 3.66% | | 7.47% | | 13.53% | |
| 1 category increase | 1.90% | | | 4.97% | | 10.07% | | 18.03% | |
| OCS, oral corticosteroids; BMI, body mass index. | | | | | | | | | | | | | | | | | |

| **Table S48. Cerebrovascular accident (stroke): predicted risk by change in mean annual OCS prescription category** (with all other factors held constant) | | | | | | | | | | | | | | | | | |
| --- | --- | --- | --- | --- | --- | --- | --- | --- | --- | --- | --- | --- | --- | --- | --- | --- | --- |
| **Example patient  profile** | **Mean pre-index OCS prescription category** | | | | **Comorbidities** | | | **Post-index change in mean annual OCS prescriptions** | **Risk of post-index outcome** | | | | | | | | |
| Yes | | No | 5 years | | | 10 years | | 15 years | | 20 years | |
| - 51-year-old man - Non-smoker | - <2/year (low) | | | | - Dyslipidaemia | | - Anxiety/ depression - Atrial fibrillation - Hypertension - T2DM | 1 category decrease | Data not shown as effect was insignificant | | | | | | | | |
| No change | 0.95% | | | 2.39% | | 4.79% | | 8.75% | |
| 1 category increase | 1.09% | | | 2.75% | | 5.50% | | 10.02% | |
| OCS, oral corticosteroids; T2DM, type 2 diabetes mellitus. | | | | | | | | | | | | | | | | | |
|  | | | | | | | | | | | | | | | | | |
| **Table S49. Cerebro-cardiovascular disease: predicted risk by change in mean annual OCS prescription category** (with all other factors held constant) | | | | | | | | | | | | | | | | | |
| **Example patient  profile** | **Mean pre-index OCS prescription category** | | **Comorbidities** | | | | | **Post-index change in mean annual OCS prescriptions** | | **Risk of post-index outcome** | | | | | | | |
| Yes | | | No | | 5 years | | 10 years | | 15 years | | | 20 years |
| - 51-year-old white man - Pre-index BMI 26.6 kg/m2 - Non-smoker | - <2/year (low) | | - Dyslipidaemia | | | - Anxiety/ depression - Atrial fibrillation - CKD (any stage) - COPD - Hypertension - Rheumatoid arthritis - Sleep apnoea - T2DM | | 1 category decrease | | Data not shown as effect was insignificant | | | | | | | |
| No change | | 1.81% | | 4.71% | | 9.45% | | | 16.53% |
| 1 category increase | | 2.44% | | 6.30% | | 12.53% | | | 21.63% |
| OCS, oral corticosteroids; BMI, body mass index; CKD, chronic kidney disease; COPD, chronic obstructive pulmonary disease; T2DM, type 2 diabetes mellitus. | | | | | | | | | | | | | | | | | |
|  | | | | | | | | | | | | | | | | | |
| **Table S50. Dyslipidaemia: predicted risk by change in mean annual OCS prescription category** (with all other factors held constant) | | | | | | | | | | | | | | | | | |
| **Example patient  profile** | | **Mean pre-index OCS prescription category** | | **Comorbidities** | | | | **Post-index change in mean annual OCS prescriptions** | | | **Risk of post-index outcome** | | | | | | |
| Yes | | No | | 5 years | | 10 years | | 15 years | | 20 years |
| - 31-year-old - Unknown race/ethnicity - Pre-index BMI 27.8 kg/m2 - Non-smoker | | - <2/year (low) | |  | | - Hypertension | | 1 category decrease | | | 6.62% | | 12.66% | | 18.70% | | 24.47% |
| No change | | | 8.00% | | 15.21% | | 22.30% | | 28.97% |
| 1 category increas0e | | | 9.94% | | 18.71% | | 27.14% | | 34.91% |
| OCS, oral corticosteroids; BMI, body mass index. | | | | | | | | | | | | | | | | | |

| **Table S51. Glaucoma: predicted risk by change in mean annual OCS prescription category** (with all other factors held constant) | | | | | | | | | | | | | | | | | | | | | | | | | | | | | | | | | | |
| --- | --- | --- | --- | --- | --- | --- | --- | --- | --- | --- | --- | --- | --- | --- | --- | --- | --- | --- | --- | --- | --- | --- | --- | --- | --- | --- | --- | --- | --- | --- | --- | --- | --- | --- |
| **Example patient  profile** | **Mean pre-index OCS prescription category** | | | | | | **Comorbidities** | | | | | | **Post-index change in mean annual OCS prescriptions** | | | | | **Risk of post-index outcome** | | | | | | | | | | | | | | | | |
| Yes | | | | | No | 5 years | | | | | 10 years | | | | | | 15 years | | | | 20 years | |
| - 51-year-old | - <2/year (low) | | | | | |  | | | | |  | 1 category decrease | | | | | 0.37% | | | | | 0.83% | | | | | | 1.45% | | | | 2.39% | |
| No change | | | | | 0.49% | | | | | 1.08% | | | | | | 1.88% | | | | 3.10% | |
| 1 category increase | | | | | 0.68% | | | | | 1.51% | | | | | | 2.61% | | | | 4.29% | |
| OCS, oral corticosteroids. | | | | | | | | | | | | | | | | | | | | | | | | | | | | | | | | | | |
|  | | | | | | | | | | | | | | | | | | | | | | | | | | | | | | | | | | |
| **Table S52. Heart failure: predicted risk by change in mean annual OCS prescription category** (with all other factors held constant) | | | | | | | | | | | | | | | | | | | | | | | | | | | | | | | | | | |
| **Example patient  profile** | | **Mean pre-index OCS prescription category** | | | | | | | **Comorbidities** | | | | **Post-index change in mean annual OCS prescriptions** | | | | | | **Risk of post-index outcome** | | | | | | | | | | | | | | | |
| Yes | | | No | 5 years | | | | | 10 years | | | | | | 15 years | | | 20 years | |
| - 51-year-old man - Pre-index BMI 26.6 kg/m2 - Non-smoker | | - <2/year (low) | | | | | | |  | | | - CKD (any stage) - Hypertension - MI - Sleep apnoea - T2DM | 1 category decrease | | | | | | 0.43% | | | | | 1.26% | | | | | | 2.67% | | | 5.10% | |
| No change | | | | | | 0.53% | | | | | 1.56% | | | | | | 3.30% | | | 6.29% | |
| 1 category increase | | | | | | 0.82% | | | | | 2.37% | | | | | | 5.01% | | | 9.46% | |
| OCS, oral corticosteroids; BMI, body mass index; CKD, chronic kidney disease; MI, myocardial infarction; T2DM, type 2 diabetes mellitus. | | | | | | | | | | | | | | | | | | | | | | | | | | | | | | | | | | |
|  | | | | | | | | | | | | | | | | | | | | | | | | | | | | | | | | | | |
| **Table S53. Hypertension: predicted risk by change in mean annual OCS prescription category** (with all other factors held constant) | | | | | | | | | | | | | | | | | | | | | | | | | | | | | | | | | | |
| **Example patient  profile** | | **Mean pre-index OCS prescription category** | | | | | | | | **Comorbidities** | | | **Post-index change in mean annual OCS prescriptions** | | | | | | | **Risk of post-index outcome** | | | | | | | | | | | | | | |
| Yes | | No | 5 years | | | | | 10 years | | | | | | 15 years | | 20 years | |
| - Unknown race/ethnicity - Pre-index BMI: 22.0 kg/m2 - Smoker | | - <2/year (low) | | | | | | | |  | |  | 1 category decrease | | | | | | | 14.85% | | | | | 29.23% | | | | | | 43.68% | | 56.53% | |
| No change | | | | | | | 7.88% | | | | | 34.52% | | | | | | 50.51% | | 63.96% | |
| 1 category increase | | | | | | | 18.66% | | | | | 35.85% | | | | | | 52.16% | | 65.70% | |
| OCS, oral corticosteroids; BMI, body mass index. | | | | | | | | | | | | | | | | | | | | | | | | | | | | | | | | | | |
|  | | | | | | | | | | | | | | | | | | | | | | | | | | | | | | | | | | |
| **Table S54. Non-menopausal osteoporosis: predicted risk by change in mean annual OCS prescription category** (with all other factors held constant) | | | | | | | | | | | | | | | | | | | | | | | | | | | | | | | | | | |
| **Example patient  profile** | | **Mean pre-index OCS prescription category** | | | | | | | | **Comorbidities** | | | **Post-index change in mean annual OCS prescriptions** | | | | | | | | **Risk of post-index outcome** | | | | | | | | | | | | | |
| Yes | | No | 5 years | | | | | 10 years | | | | | 15 years | | 20 years | |
| - 51-year-old woman - Pre-index BMI: 22.8 kg/m2 - Ex-smoker | | - <2/year (low) | | | | | | | |  | | - Liver disease - Rheumatoid arthritis | 1 category decrease | | | | | | | | 0.90% | | | | | 2.41% | | | | | 5.01% | | 9.43% | |
| No change | | | | | | | | 1.56% | | | | | 4.13% | | | | | 8.52% | | 15.76% | |
| 1 category increase | | | | | | | | 3.30% | | | | | 7.94% | | | | | 16.00% | | 28.55% | |
| OCS, oral corticosteroids; BMI, body mass index. | | | | | | | | | | | | | | | | | | | | | | | | | | | | | | | | | | |
| **Table S55. Non-menopausal osteoporotic fractures: predicted risk by change in mean annual OCS prescription category** (with all other factors held constant) | | | | | | | | | | | | | | | | | | | | | | | | | | | | | | | | | | |
| **Example patient  profile** | | | **Mean pre-index OCS prescription category** | | | | | | **Comorbidities** | | | | | **Post-index change in mean annual OCS prescriptions** | | | | | | | **Risk of post-index outcome** | | | | | | | | | | | | | |
| Yes | | | No | | 5 years | | | | | 10 years | | | | | 15 years | | 20 years | |
| - 51-year-old - Pre-index BMI: 26.6 kg/m2 - Non-smoker | | | - <2/year (low) | | | | | |  | | | - Osteoporosis | | 1 category decrease | | | | | | | Data not shown as effect was insignificant | | | | | | | | | | | | | |
| No change | | | | | | | 0.11% | | | | | 0.32% | | | | | 0.82% | | 1.82% | |
| 1 category increase | | | | | | | 0.20% | | | | | 0.57% | | | | | 1.46% | | 3.23% | |
| OCS, oral corticosteroids; BMI, body mass index. | | | | | | | | | | | | | | | | | | | | | | | | | | | | | | | | | | |
|  | | | | | | | | | | | | | | | | | | | | | | | | | | | | | | | | | | |
| **Table S56. Post-menopausal osteoporotic fractures: predicted risk by change in mean annual OCS prescription category** (with all other factors held constant) | | | | | | | | | | | | | | | | | | | | | | | | | | | | | | | | | | |
| **Example patient  profile** | | | | **Mean pre-index OCS prescription category** | | | | | **Comorbidities** | | | | | | **Post-index change in mean annual OCS prescriptions** | | | | | | **Risk of post-index outcome** | | | | | | | | | | | | | |
| Yes | | | No | | | 5 years | | | | | 10 years | | | | | 15 years | | 20 years | |
| - Woman 4.95 years since menopause onset - Pre-index BMI: 33.5 kg/m2 | | | | - <2/year (low) | | | | |  | | | - CKD (any stage) - COPD - Osteoporosis - Liver disease | | | 1 category decrease | | | | | | 0.38% | | | | | 1.04% | | | | | 1.97% | | 3.44% | |
| No change | | | | | | 0.51% | | | | | 1.41% | | | | | 2.68% | | 4.66% | |
| 1 category increase | | | | | | 0.66% | | | | | 1.81% | | | | | 3.42% | | 5.94% | |
| OCS, oral corticosteroids; BMI, body mass index; CKD, chronic kidney disease; COPD, chronic obstructive pulmonary disease. | | | | | | | | | | | | | | | | | | | | | | | | | | | | | | | | | | |
|  | | | | | | | | | | | | | | | | | | | | | | | | | | | | | | | | | | |
| **Table S57. Peptic ulcer: predicted risk by change in mean annual OCS prescription category** (with all other factors held constant) | | | | | | | | | | | | | | | | | | | | | | | | | | | | | | | | | | |
| **Example patient  profile** | | | | | **Mean pre-index OCS prescription category** | | | | **Comorbidities** | | | | | | | **Post-index change in mean annual OCS prescriptions** | | | | | | **Risk of post-index outcome** | | | | | | | | | | | | |
| Yes | | No | | | | | 5 years | | | | | 10 years | | | | 15 years | | 20 years | |
| - 51-year-old man - Pre-index BMI: 22.6 kg/m2 - Non-smoker | | | | | - <2/year (low) | | | |  | |  | | | | | 1 category decrease | | | | | | Data not shown as effect was insignificant | | | | | | | | | | | | |
| No change | | | | | | 0.52% | | | | | 1.24% | | | | 2.15% | | 3.24% | |
| 1 category increase | | | | | | 0.66% | | | | | 1.57% | | | | 2.73% | | 4.09% | |
| OCS, oral corticosteroids; BMI, body mass index. | | | | | | | | | | | | | | | | | | | | | | | | | | | | | | | | | | |
|  | | | | | | | | | | | | | | | | | | | | | | | | | | | | | | | | | | |
| **Table S58. Pneumonia: predicted risk by change in mean annual OCS prescription category** (with all other factors held constant) | | | | | | | | | | | | | | | | | | | | | | | | | | | | | | | | | | |
| **Example patient  profile** | | | | | | **Mean pre-index OCS prescription category** | | **Comorbidities** | | | | | | | | | **Post-index change in mean annual OCS prescriptions** | | | | | **Risk of post-index outcome** | | | | | | | | | | | | |
| Yes | | | No | | | | | | 5 years | | | | | | 10 years | | | | 15 years | | 20 years |
| - 51-year-old - Non-smoker | | | | | | - <2/year (low) | | - Epilepsy | | | - CKD (any stage) - COPD - Diabetes (any) - Liver disease - Pre-index pneumonia - Stroke | | | | | | 1 category decrease | | | | | 1.14% | | | | | | 3.04% | | | | 6.15% | | 10.07% |
| No change | | | | | 1.51% | | | | | | 3.99% | | | | 8.04% | | 13.08% |
| 1 category increase | | | | | 2.50% | | | | | | 6.57% | | | | 13.06% | | 20.88% |
| OCS, oral corticosteroids; BMI, body mass index; CKD, chronic kidney disease; COPD, chronic obstructive pulmonary disease. | | | | | | | | | | | | | | | | | | | | | | | | | | | | | | | | | | |

| **Table S59. Renal impairment (CKD stage ≥3): predicted risk by change in mean annual OCS prescription category** (with all other factors held constant) | | | | | | | | | | | |
| --- | --- | --- | --- | --- | --- | --- | --- | --- | --- | --- | --- |
| **Example patient  profile** | **Mean pre-index OCS prescription category** | **Comorbidities** | | | **Post-index change in mean annual OCS prescriptions** | | | **Risk of post-index outcome** | | | |
| Yes | No | | 5 years | 10 years | 15 years | 20 years |
| - 51-year-old white man - Pre-index BMI: 26.6 kg/m2 - Non-smoker | - <2/year (low) |  | - Hypertension - T2DM | | 1 category decrease | | | 0.74% | 1.64% | 3.04% | 4.91% |
| No change | | | 1.04% | 2.30% | 4.26% | 6.86% |
| 1 category increase | | | 1.46% | 3.22% | 5.93% | 9.50% |
| CKD, chronic kidney disease; OCS, oral corticosteroids; BMI, body mass index; T2DM, type 2 diabetes mellitus. | | | | | | | | | | | |
|  | | | | | | | | | | | |
| **Table S60. Sleep apnoea: predicted risk by change in mean annual OCS prescription category** (with all other factors held constant) | | | | | | | | | | | |
| **Example patient  profile** | **Mean pre-index OCS prescription category** | **Comorbidities** | | | **Post-index change in mean annual OCS prescriptions** | | | **Risk of post-index outcome** | | | |
| Yes | No | | 5 years | 10 years | 15 years | 20 years |
| - 51-year-old white man - Pre-index BMI: 22.6 kg/m2 - Non-smoker | - <2/year (low) |  |  | | 1 category decrease | | | 0.67% | 1.41% | 2.35% | 3.07% |
| No change | | | 0.97% | 2.03% | 3.38% | 4.40% |
| 1 category increase | | | 1.47% | 3.08% | 5.12% | 6.66% |
| OCS, oral corticosteroids; BMI, body mass index. | | | | | | | | | | | |
|  | | | | | | | | | | | |
| **Table S61. Type 2 diabetes mellitus: predicted risk by change in mean annual OCS prescription category** (with all other factors held constant) | | | | | | | | | | | |
| **Example patient  profile** | **Mean pre-index OCS prescription category** | **Comorbidities** | | | | **Post-index change in mean annual OCS prescriptions** | **Risk of post-index outcome** | | | | |
| Yes | | No | | 5 years | | 10 years | 15 years | 20 years |
| - 51-year-old white woman - Pre-index BMI: 22.8 kg/m2 - Ex-smoker | - <2/year (low) | - Anxiety/ depression | | - Hypertension - CCVD | | 1 category decrease | 1.29% | | 2.88% | 4.81% | 7.26% |
| No change | 1.59% | | 3.54% | 5.89% | 8.86% |
| 1 category increase | 2.45% | | 5.43% | 8.99% | 13.41% |
| OCS, oral corticosteroids; BMI, body mass index; CCVD, cerebro-cardiovascular disease. | | | | | | | | | | | |

**
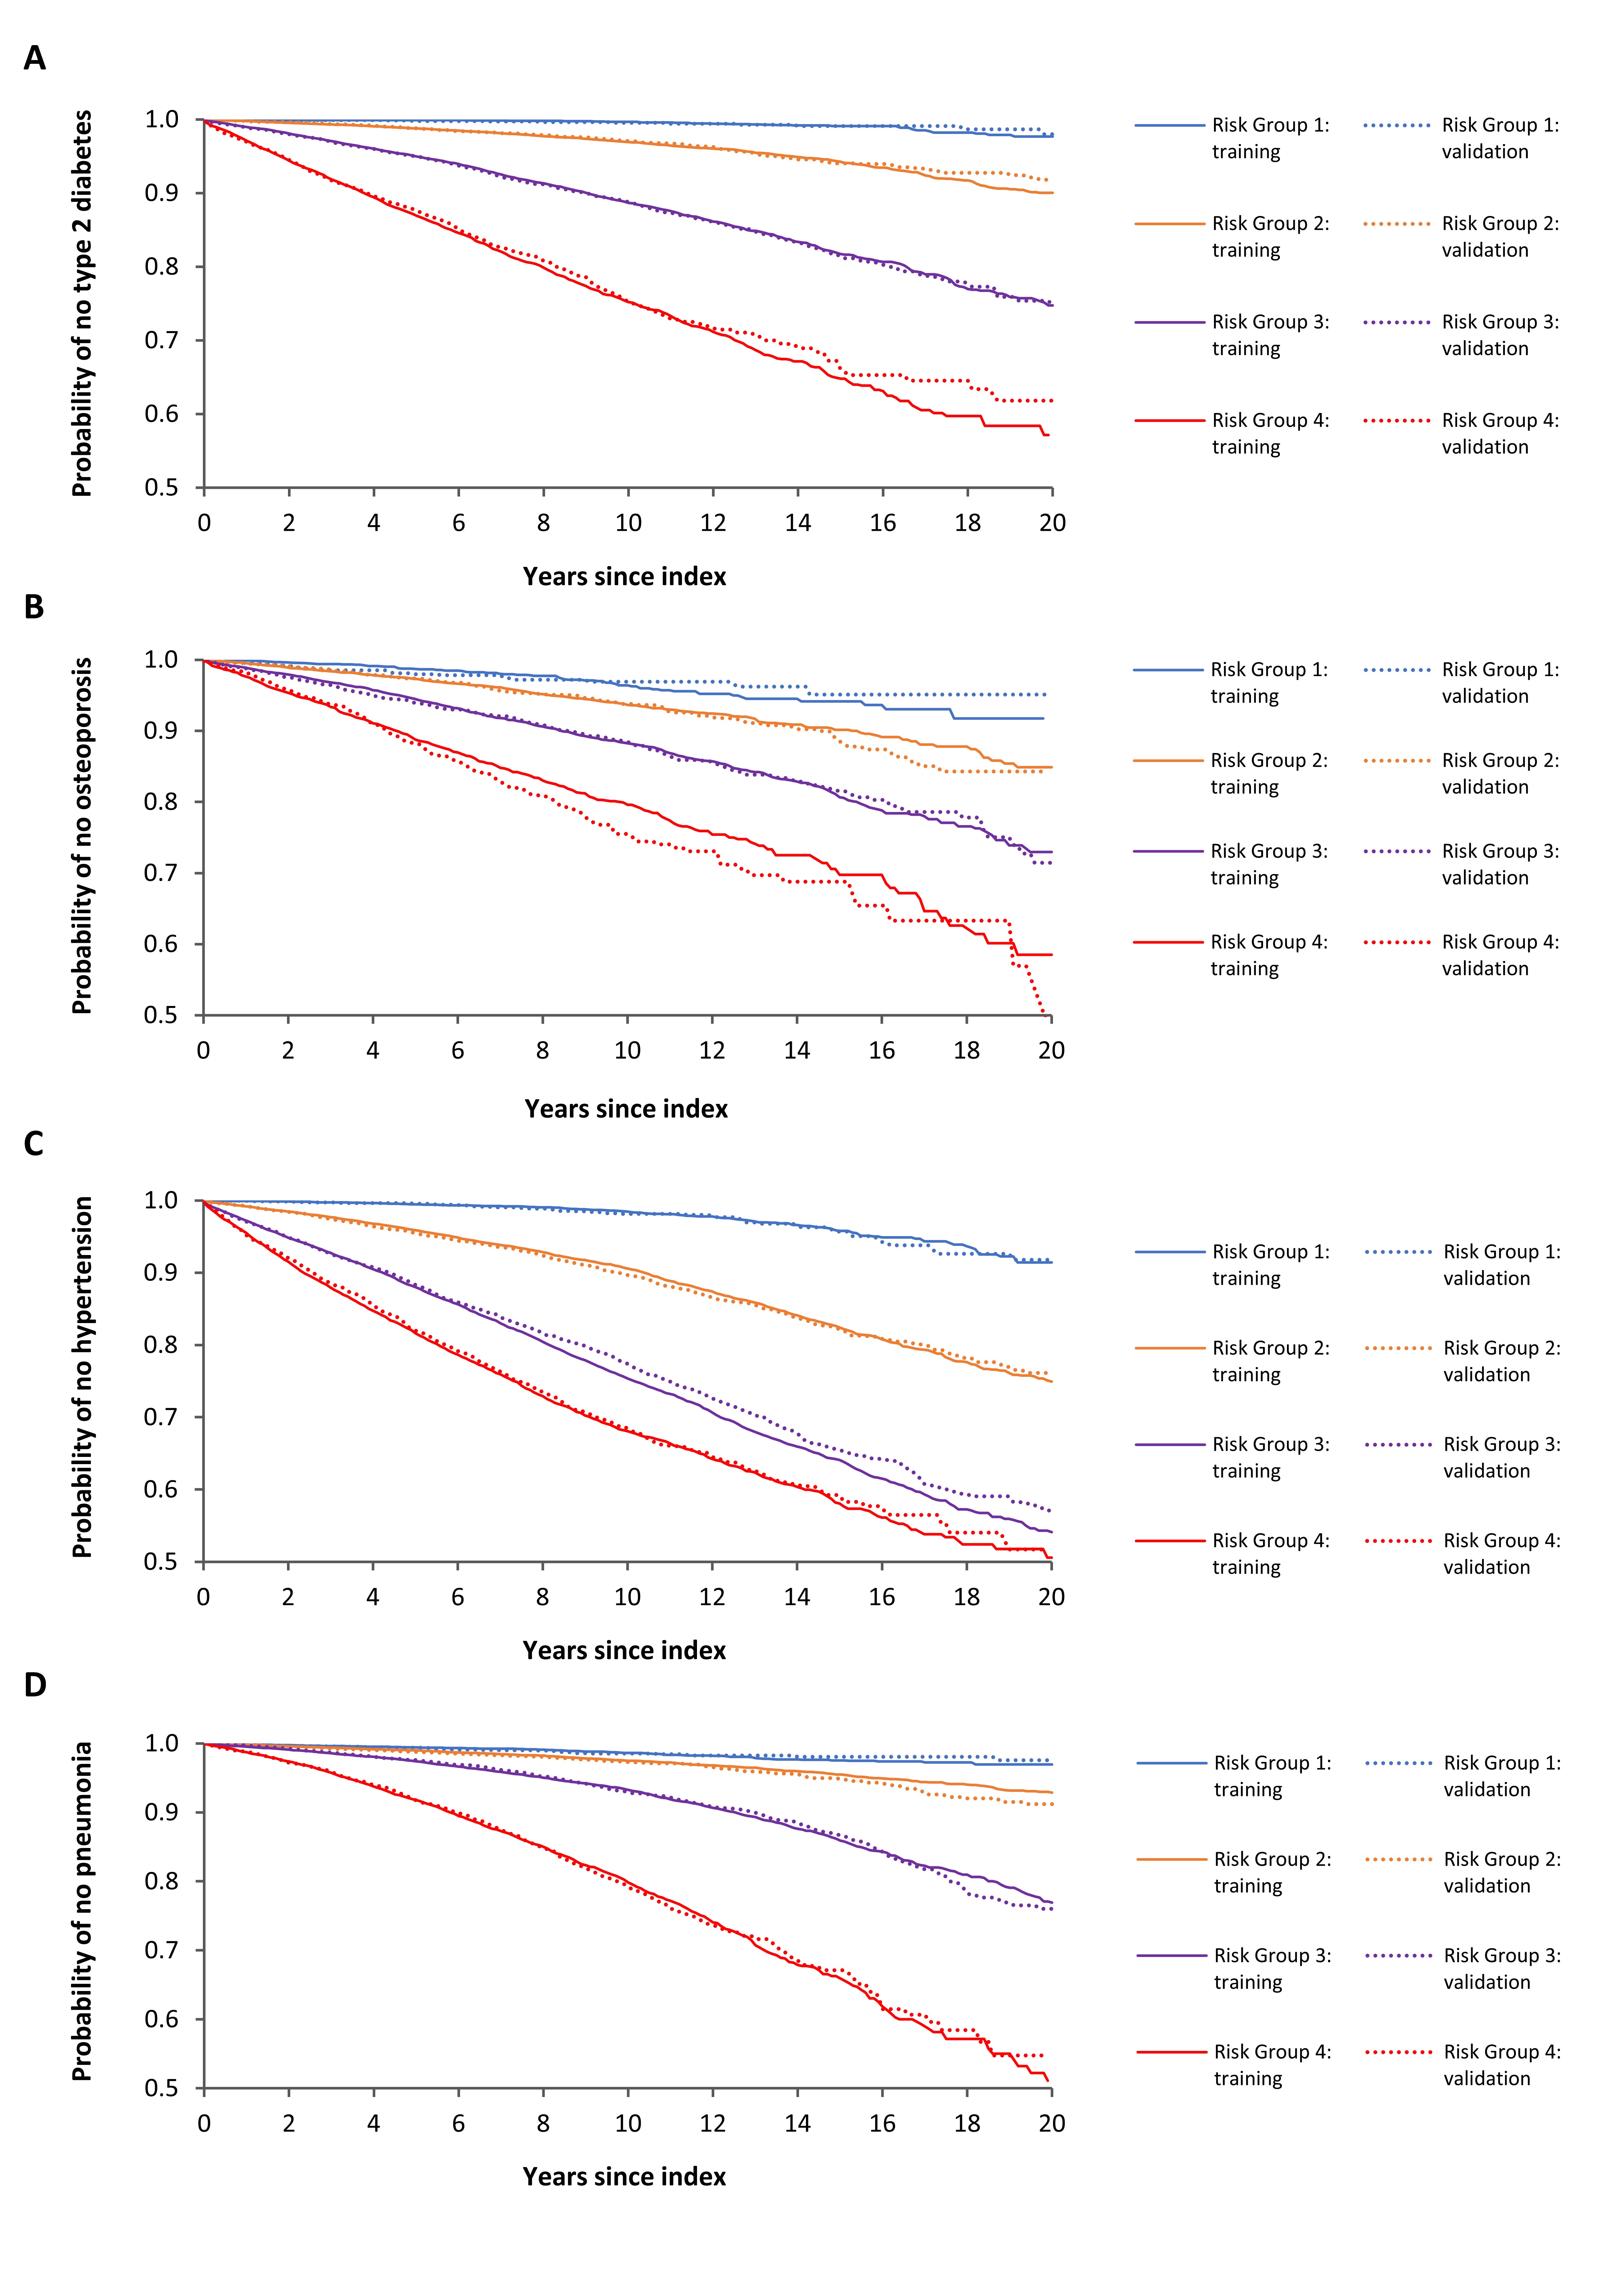
**

**Figure S1**. Kaplan Meier curves showing survival by risk group. A) Type 2 diabetes. B) Post-menopausal osteoporosis. C) Hypertension. D) Pneumonia.
